# Supplementary material for: Highly Evolvable: Investigating Interspecific and Intraspecific Venom Variation in Taipans (Oxyuranus spp.) and Brown Snakes (Pseudonaja spp.)
Source: MDPI journal article supplement (doi:10.3390/toxins15010074), 2023-01-13
Supplement: s1 [file s1]

## Supplementary Materials

### Highly evolvable: investigating interspecific and intraspecific venom variation in taipans (*Oxyuranus* spp.) and brown snakes (*Pseudonaja* spp.)

Jory van Thiel <sup>1,2,3</sup>, Luis L. Alonso <sup>1,4</sup>, Julien Slagboom <sup>1,4</sup>, Nathan Dunstan <sup>5</sup>, Roel M. Wouters <sup>2</sup>, Cassandra M. Modahl <sup>6</sup>, Freek J. Vonk <sup>1,3,4</sup>, Timothy N. W. Jackson <sup>7</sup> and Jeroen Kool <sup>1,4,\*</sup>

- 1 Division of Bioanalytical Chemistry, Department of Chemistry and Pharmaceutical Sciences, Faculty of Sciences, Amsterdam Institute of Molecular and Life Sciences (AIMMS), Vrije Universiteit Amsterdam, 1081 HV Amsterdam, The Netherlands.
- 2 Institute of Biology Leiden, Leiden University, 2333 BE Leiden, The Netherlands.
- 3 Naturalis Biodiversity Center, 2333 CR Leiden, The Netherlands
- 4 Centre for Analytical Sciences Amsterdam (CASA), 1012 WX Amsterdam, The Netherlands
- 5 Venom Supplies Pty. Ltd., Tanunda, SA 5352, Australia.
- 6 Centre for Snakebite Research & Interventions, Liverpool School of Tropical Medicine, Liverpool L3 5QA, UK.
- 7 Australian Venom Research Unit, Department of Pharmacology and Therapeutics, University of Melbourne, Parkville, VIC 3010, Australia.

**Supplementary Table S1. Overview of the selected venom samples used in this study.** The asterisk (\*) indicates the official state of Saibai Island (Queensland, respectively). However, Saibai Island is geographically closer related to Papua New Guinea (PNG), so in our analyses we referred to it as PNG.

|    | Species                               | Gender | Sample ID | Location           | State or territory |
|----|---------------------------------------|--------|-----------|--------------------|--------------------|
| 1  | <i>Oxyuranus scutellatus</i>          | Male   | OS786     | Cooktown           | Queensland         |
| 2  | <i>Oxyuranus scutellatus</i>          | Female | OS785     | Mount Molloy       | Queensland         |
| 3  | <i>Oxyuranus scutellatus</i>          | Male   | OS787     | Gladstone          | Queensland         |
| 4  | <i>Oxyuranus scutellatus</i>          | Female | OS419     | Cooktown           | Queensland         |
| 5  | <i>Oxyuranus scutellatus</i>          | Female | OS844     | Unknown            | Northern Territory |
| 6  | <i>Oxyuranus scutellatus</i>          | Male   | OS371     | Gladstone          | Queensland         |
| 7  | <i>Oxyuranus scutellatus (canini)</i> | Male   | OSC7      | Saibai Island      | Queensland*        |
| 8  | <i>Oxyuranus scutellatus (canini)</i> | Female | OSC4      | Saibai Island      | Queensland*        |
| 9  | <i>Oxyuranus scutellatus (canini)</i> | Female | OS842     | Merauke            | Merauke Regency    |
| 10 | <i>Oxyuranus microlepidotus</i>       | Male   | OM109     | Boulia             | Queensland         |
| 11 | <i>Oxyuranus microlepidotus</i>       | Male   | OM116     | Cooper Peedy       | South Australia    |
| 12 | <i>Oxyuranus microlepidotus</i>       | Male   | OM100     | Goyders Lagoon     | South Australia    |
| 13 | <i>Oxyuranus temporalis</i>           | Male   | OT1       | Ilkurlka Community | Western Australia  |
| 14 | <i>Oxyuranus temporalis</i>           | Female | OT2       | Ilkurlka Community | Western Australia  |
| 15 | <i>Pseudonaja guttata</i>             | Male   | SB22      | Longreach          | Queensland         |
| 16 | <i>Pseudonaja modesta</i>             | Female | PMOD13    | Carnarvon          | Western Australia  |
| 17 | <i>Pseudonaja ingrami</i>             | Male   | PIN8      | Barkly             | Northern Territory |
| 18 | <i>Pseudonaja mengdeni</i>            | Male   | PM6       | Boulia             | Queensland         |
| 19 | <i>Pseudonaja mengdeni</i>            | Male   | PM8       | Roxby              | South Australia    |
| 20 | <i>Pseudonaja nuchalis</i>            | Male   | PN38      | Tennant Creek      | Northern Territory |
| 21 | <i>Pseudonaja nuchalis</i>            | Female | PN37      | Darwin             | Northern Territory |
| 22 | <i>Pseudonaja textilis</i>            | Male   | CB467     | Mackay             | Queensland         |
| 23 | <i>Pseudonaja textilis</i>            | Male   | CB479     | Gold Coast         | Queensland         |
| 24 | <i>Pseudonaja textilis</i>            | Female | CB485     | Lobethal           | South Australia    |
| 25 | <i>Pseudonaja textilis</i>            | Male   | CB493     | Alice Springs      | Northern Territory |
| 26 | <i>Pseudonaja inframacula</i>         | Male   | PI22      | Marion Bay         | South Australia    |

|    |                                 |        |       |                   |                   |
|----|---------------------------------|--------|-------|-------------------|-------------------|
| 27 | <i>Pseudonaja aspidorhyncha</i> | Male   | PAS25 | Witchelina        | South Australia   |
| 28 | <i>Pseudonaja aspidorhyncha</i> | Male   | PAS22 | Middleback Ranges | South Australia   |
| 29 | <i>Pseudonaja aspidorhyncha</i> | Male   | PAS32 | Streaky Bay       | South Australia   |
| 30 | <i>Pseudonaja affinis</i>       | Female | PF23  | South Perth       | Western Australia |
| 31 | <i>Pseudonaja affinis</i>       | Female | PF30  | Smokey Bay        | South Australia   |

*Oxyuranus temporalis* - Ilkurlka Community (OT1)

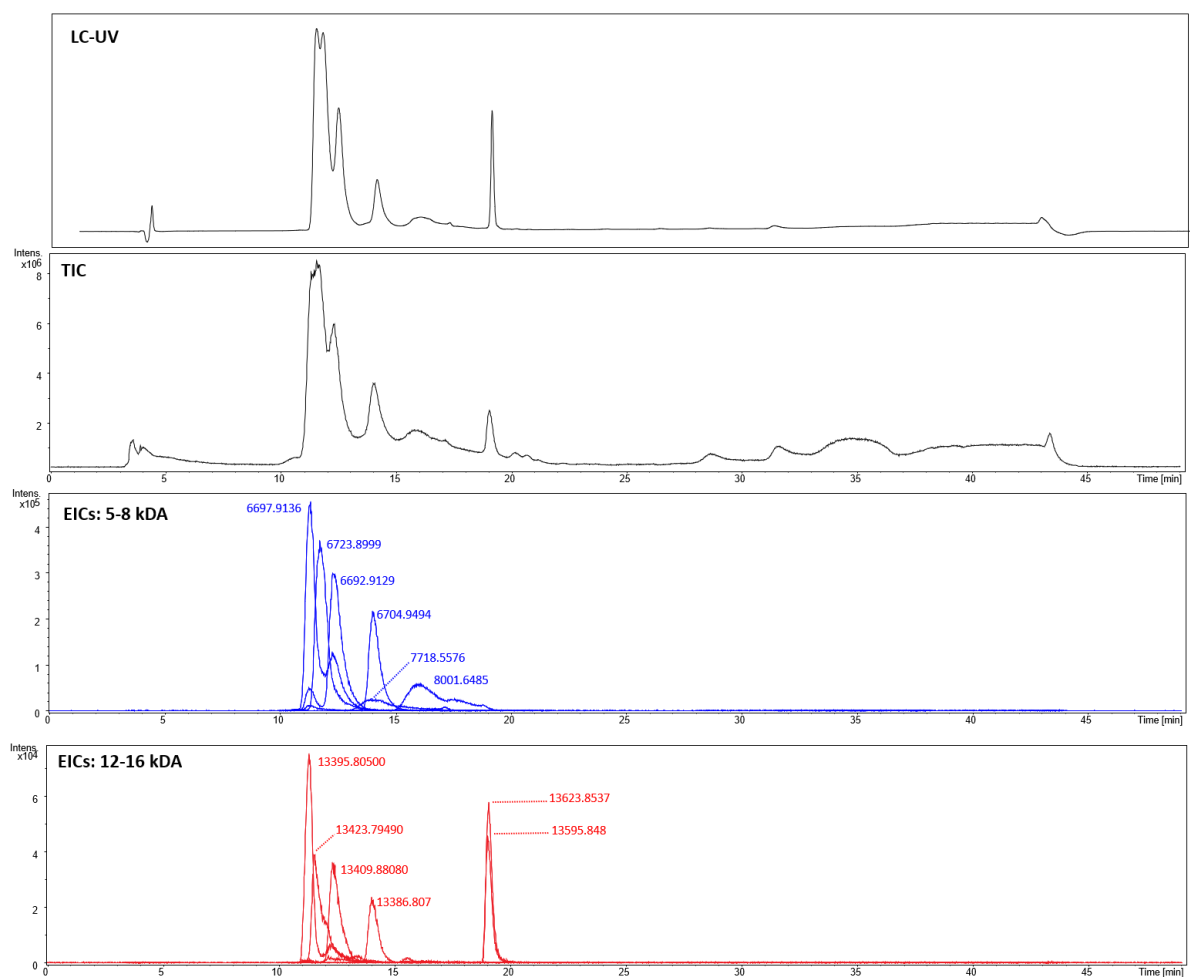

**Supplementary Figure S1.** LC-UV-MS chromatogram alignments highlight the abundant venom toxins in *Oxyuranus temporalis* (OT1) venom. LC-UV peaks indicate the relative protein abundance following separation. TIC shows the summary of all measured intensities. EICs display the extracted, high-abundant masses in the venom. EICs are sorted based on their mass range to enhance visibility (i.e., mass ranges of 5-8 kDa and 12-16 kDa). Key: LC-UV, liquid chromatography coupled to ultraviolet detection; TIC, Total Ion Chromatogram; EICs, Extracted Ion Chromatograms; MS, mass spectrometry.

*Oxyuranus temporalis* - Ilkurlka Community (OT2)

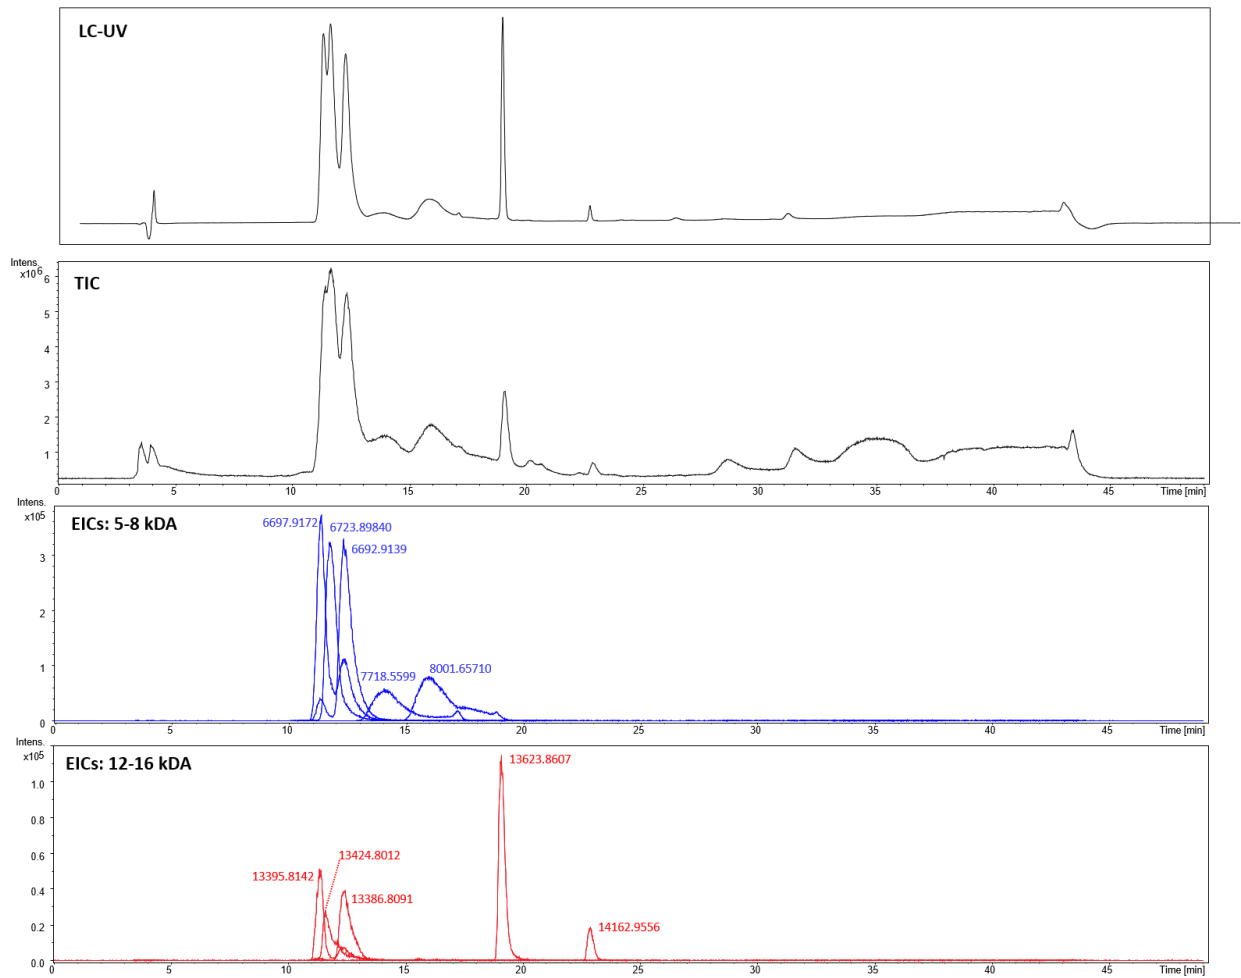

**Supplementary Figure S2.** LC-UV-MS chromatogram alignments highlight the abundant venom toxins in *Oxyuranus temporalis* (OT2) venom. LC-UV peaks indicate the relative protein abundance following separation. TIC shows the summary of all measured intensities. EICs display the extracted, high-abundant masses in the venom. EICs are sorted based on their mass range to enhance visibility (i.e., mass ranges of 5-8 kDa and 12-16 kDa). Key: LC-UV, liquid chromatography coupled to ultraviolet detection; TIC, Total Ion Chromatogram; EICs, Extracted Ion Chromatograms; MS, mass spectrometry.

*Oxyuranus microlepidotus* - Boulia (OM109)

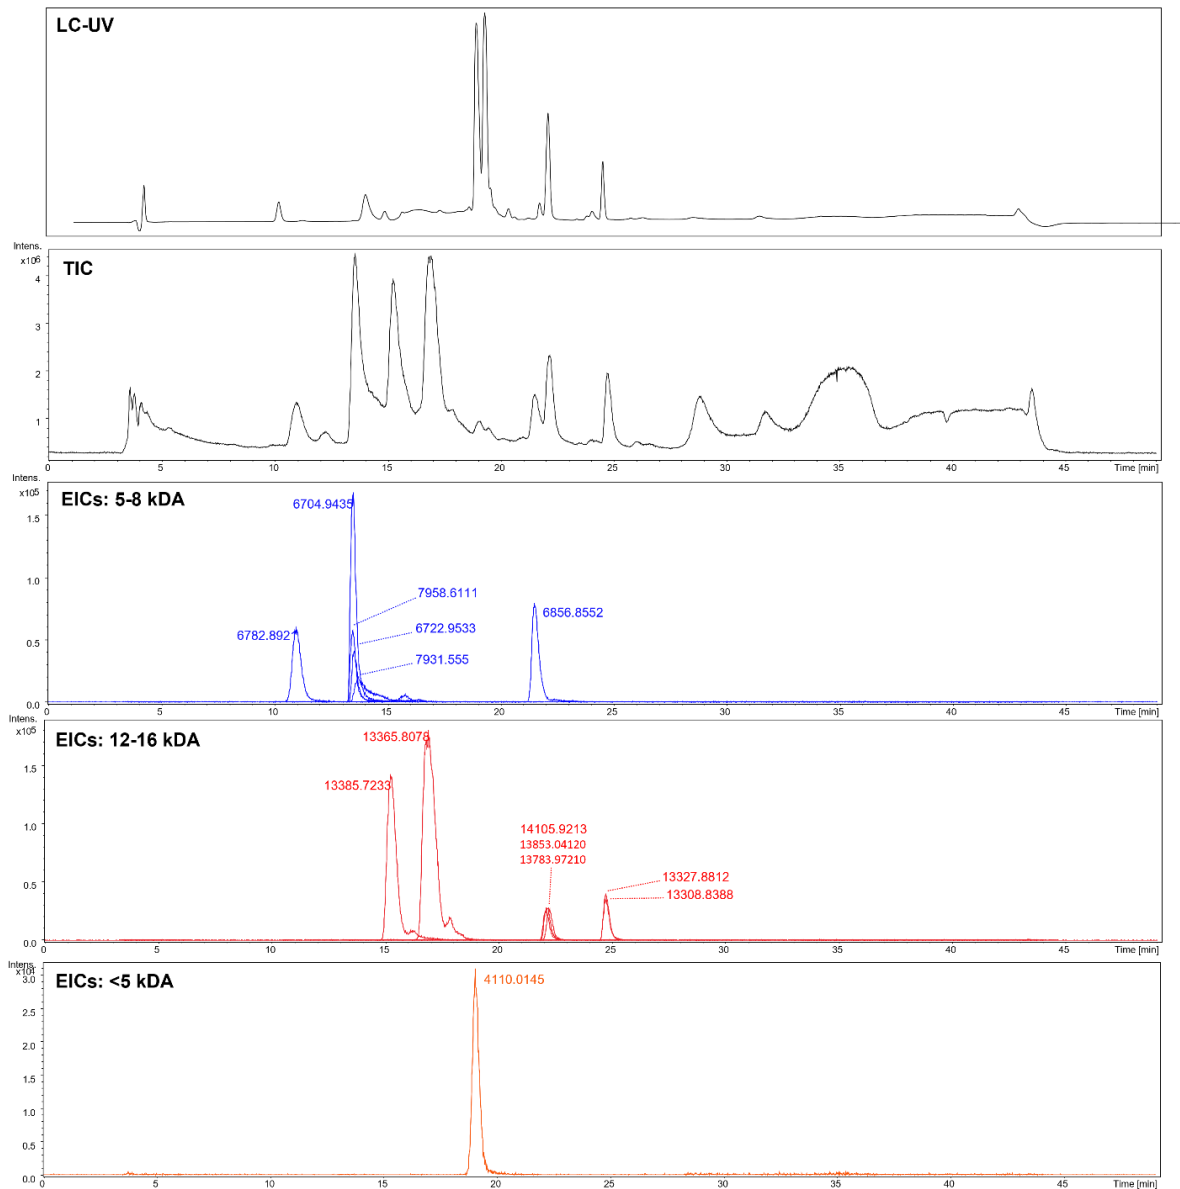

**Supplementary Figure S3.** LC-UV-MS chromatogram alignments highlight the abundant venom toxins in *Oxyuranus microlepidotus* (OM109) venom. LC-UV peaks indicate the relative protein abundance following separation. TIC shows the summary of all measured intensities. EICs display the extracted, high-abundant masses in the venom. EICs are sorted based on their mass range to enhance visibility (i.e., mass ranges of 5-8 kDa and 12-16 kDa). Key: LC-UV, liquid chromatography coupled to ultraviolet detection; TIC, Total Ion Chromatogram; EICs, Extracted Ion Chromatograms; MS, mass spectrometry.

*Oxyuranus microlepidotus* - Coober Peady (OM116)

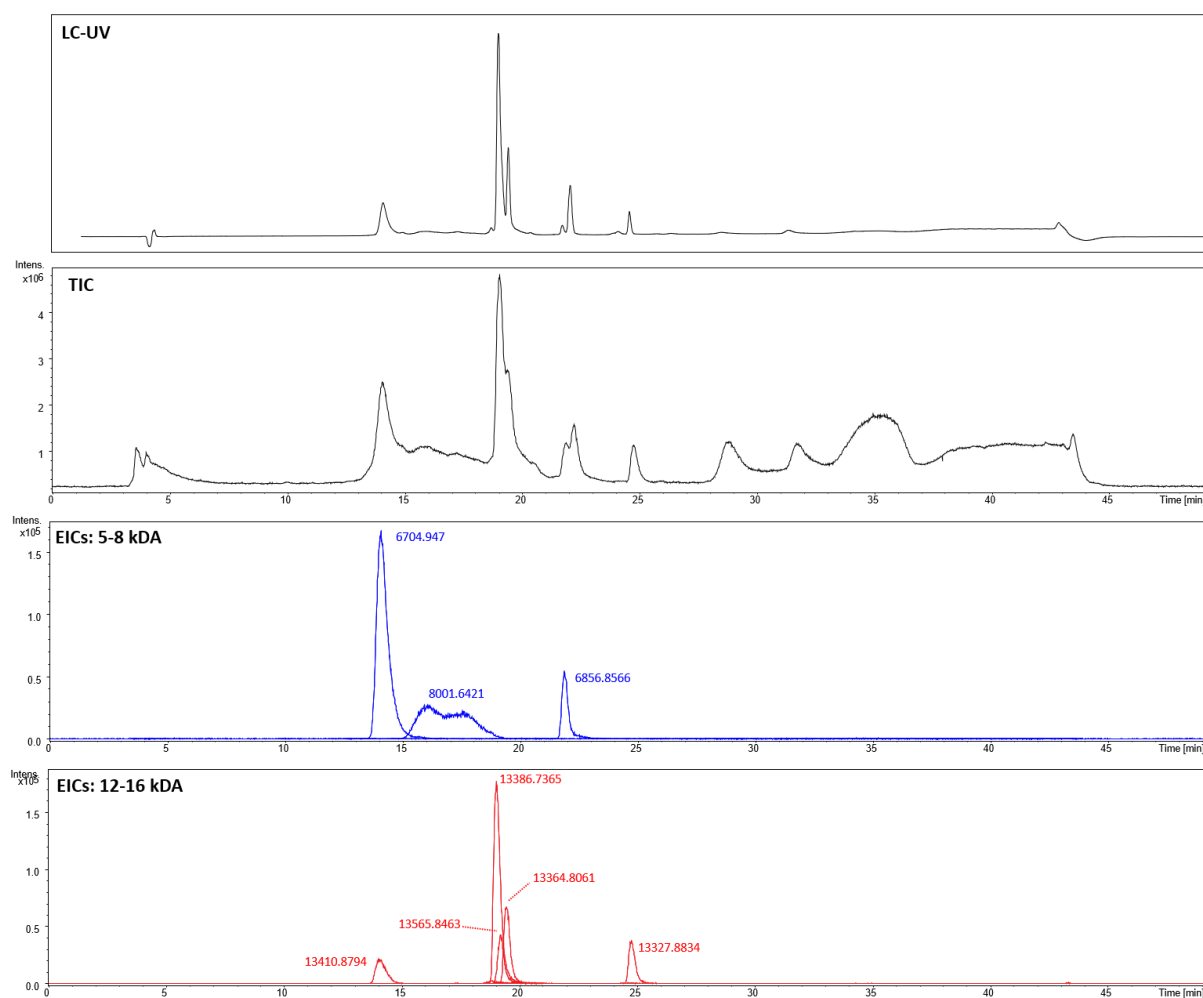

**Supplementary Figure S4.** LC-UV-MS chromatogram alignments highlight the abundant venom toxins in *Oxyuranus microlepidotus* (OM116) venom. LC-UV peaks indicate the relative protein abundance following separation. TIC shows the summary of all measured intensities. EICs display the extracted, high-abundant masses in the venom. EICs are sorted based on their mass range to enhance visibility (i.e., mass ranges of 5-8 kDa and 12-16 kDa). Key: LC-UV, liquid chromatography coupled to ultraviolet detection; TIC, Total Ion Chromatogram; EICs, Extracted Ion Chromatograms; MS, mass spectrometry.

*Oxyuranus microlepidotus* - Goyders Lagoon (OM100)

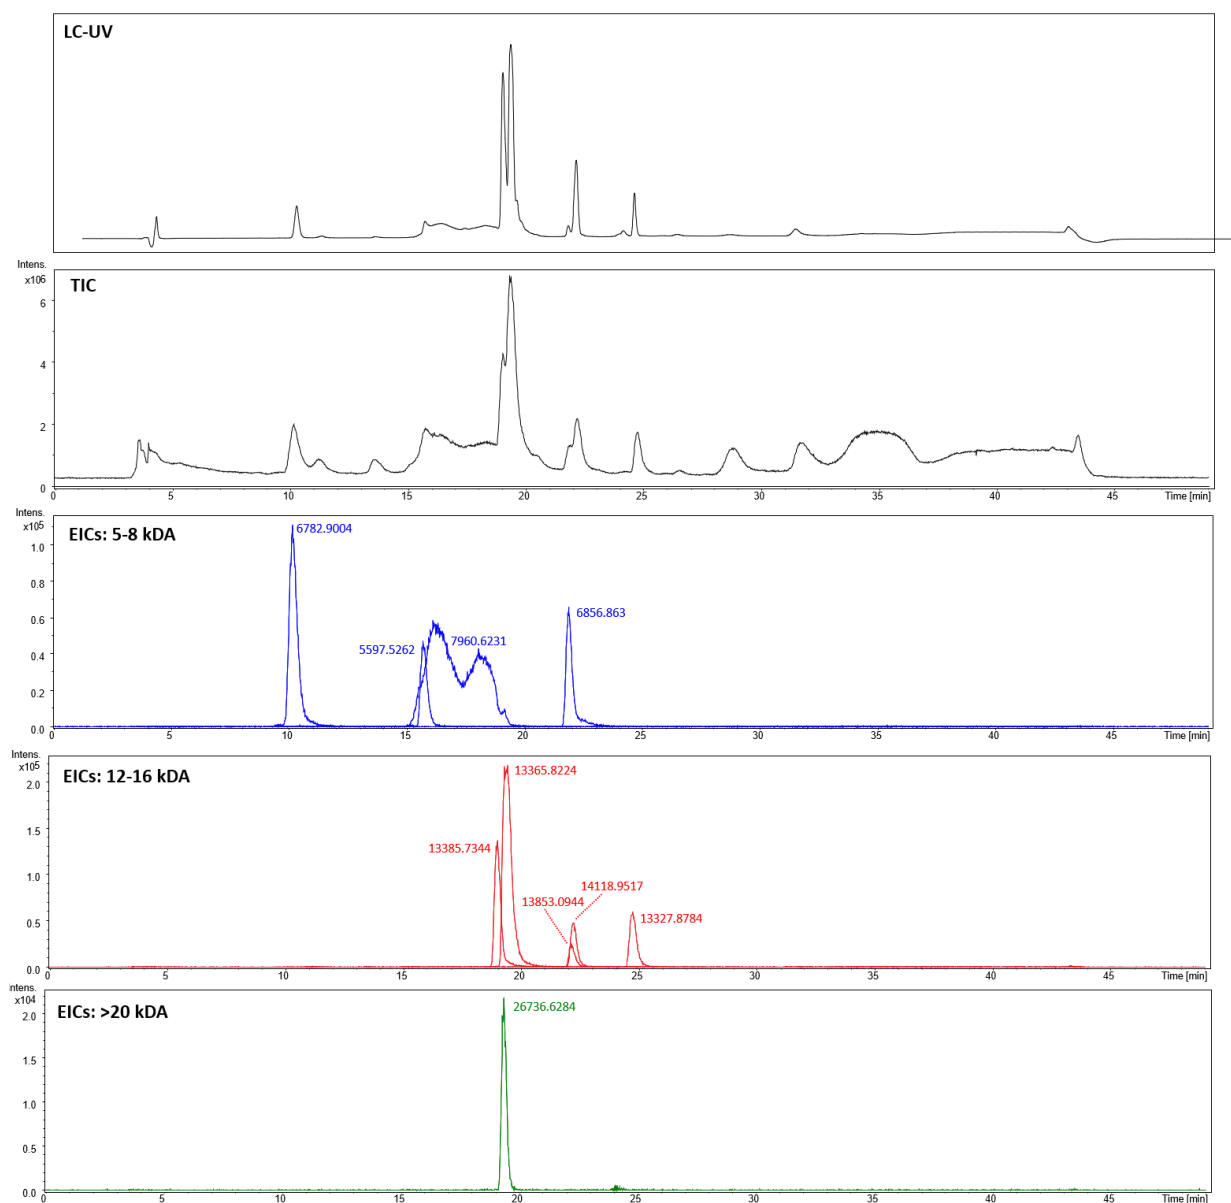

**Supplementary Figure S5.** LC-UV-MS chromatogram alignments highlight the abundant venom toxins in *Oxyuranus microlepidotus* (OM100) venom. LC-UV peaks indicate the relative protein abundance following separation. TIC shows the summary of all measured intensities. EICs display the extracted, high-abundant masses in the venom. EICs are sorted based on their mass range to enhance visibility (i.e., mass ranges of 5-8 kDa, 12-16 kDa and >20 kDa). Key: LC-UV, liquid chromatography coupled to ultraviolet detection; TIC, Total Ion Chromatogram; EICs, Extracted Ion Chromatograms; MS, mass spectrometry.



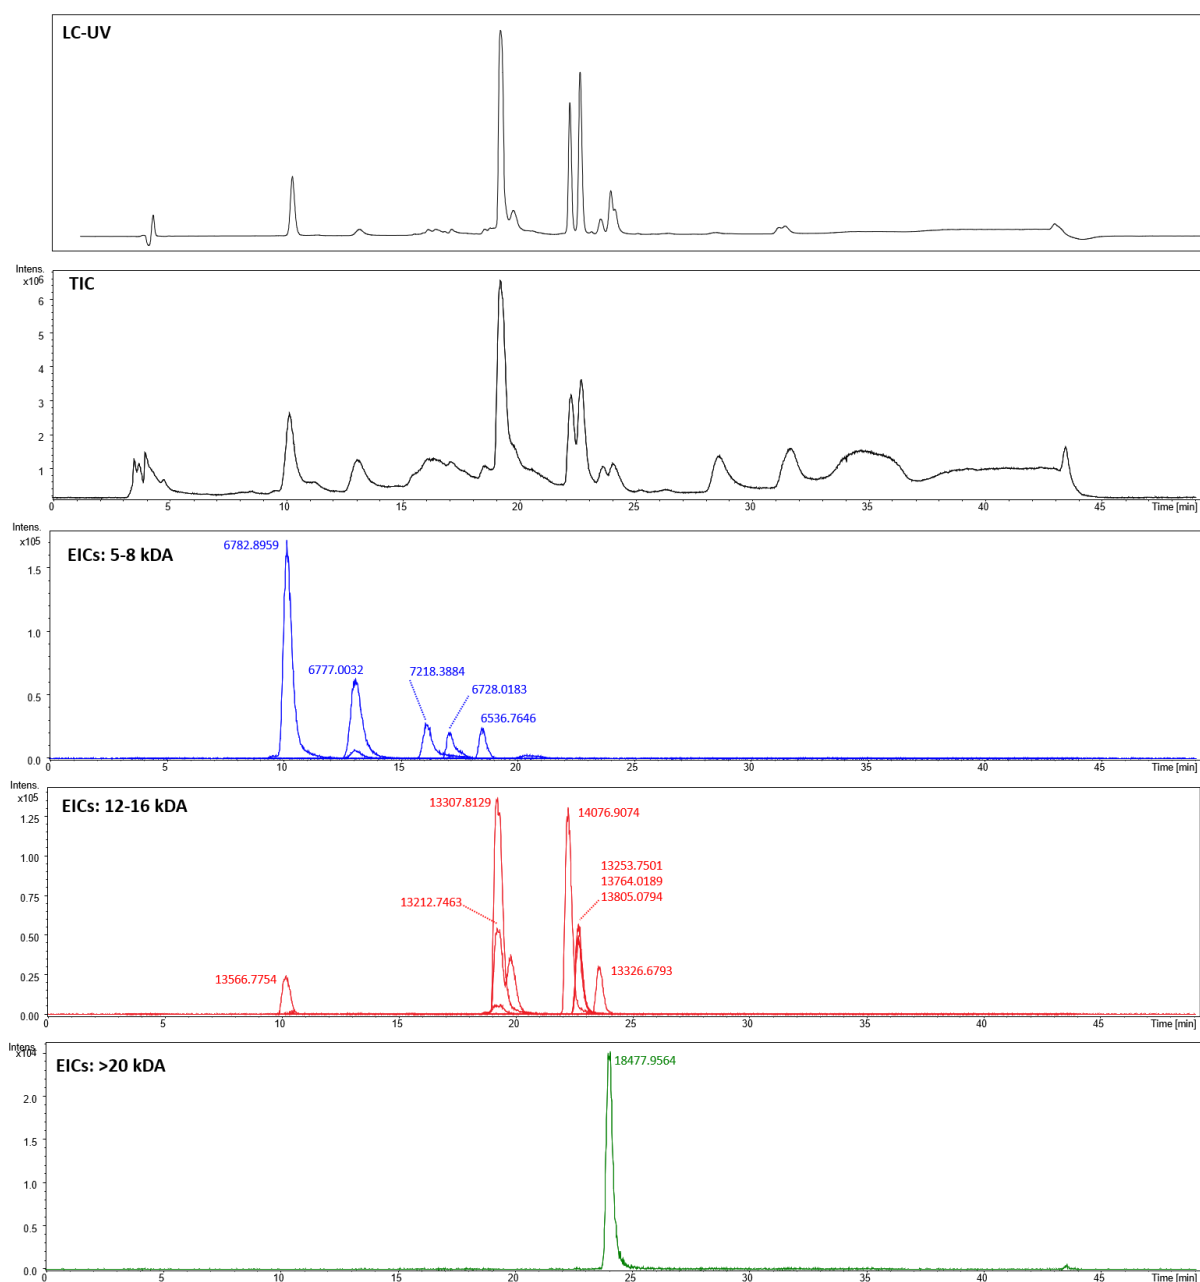

**Supplementary Figure S6.** LC-UV-MS chromatogram alignments highlight the abundant venom toxins in *Oxyuranus scutellatus* (OS419) venom. LC-UV peaks indicate the relative protein abundance following separation. TIC shows the summary of all measured intensities. EICs display the extracted, high-abundant masses in the venom. EICs are sorted based on their mass range to enhance visibility (i.e., mass ranges of 5-8 kDa, 12-16 kDa and >20 kDa). Key: LC-UV, liquid chromatography coupled to ultraviolet detection; TIC, Total Ion Chromatogram; EICs, Extracted Ion Chromatograms; MS, mass spectrometry.

*Oxyuranus scutellatus* – Cooktown (OS786)

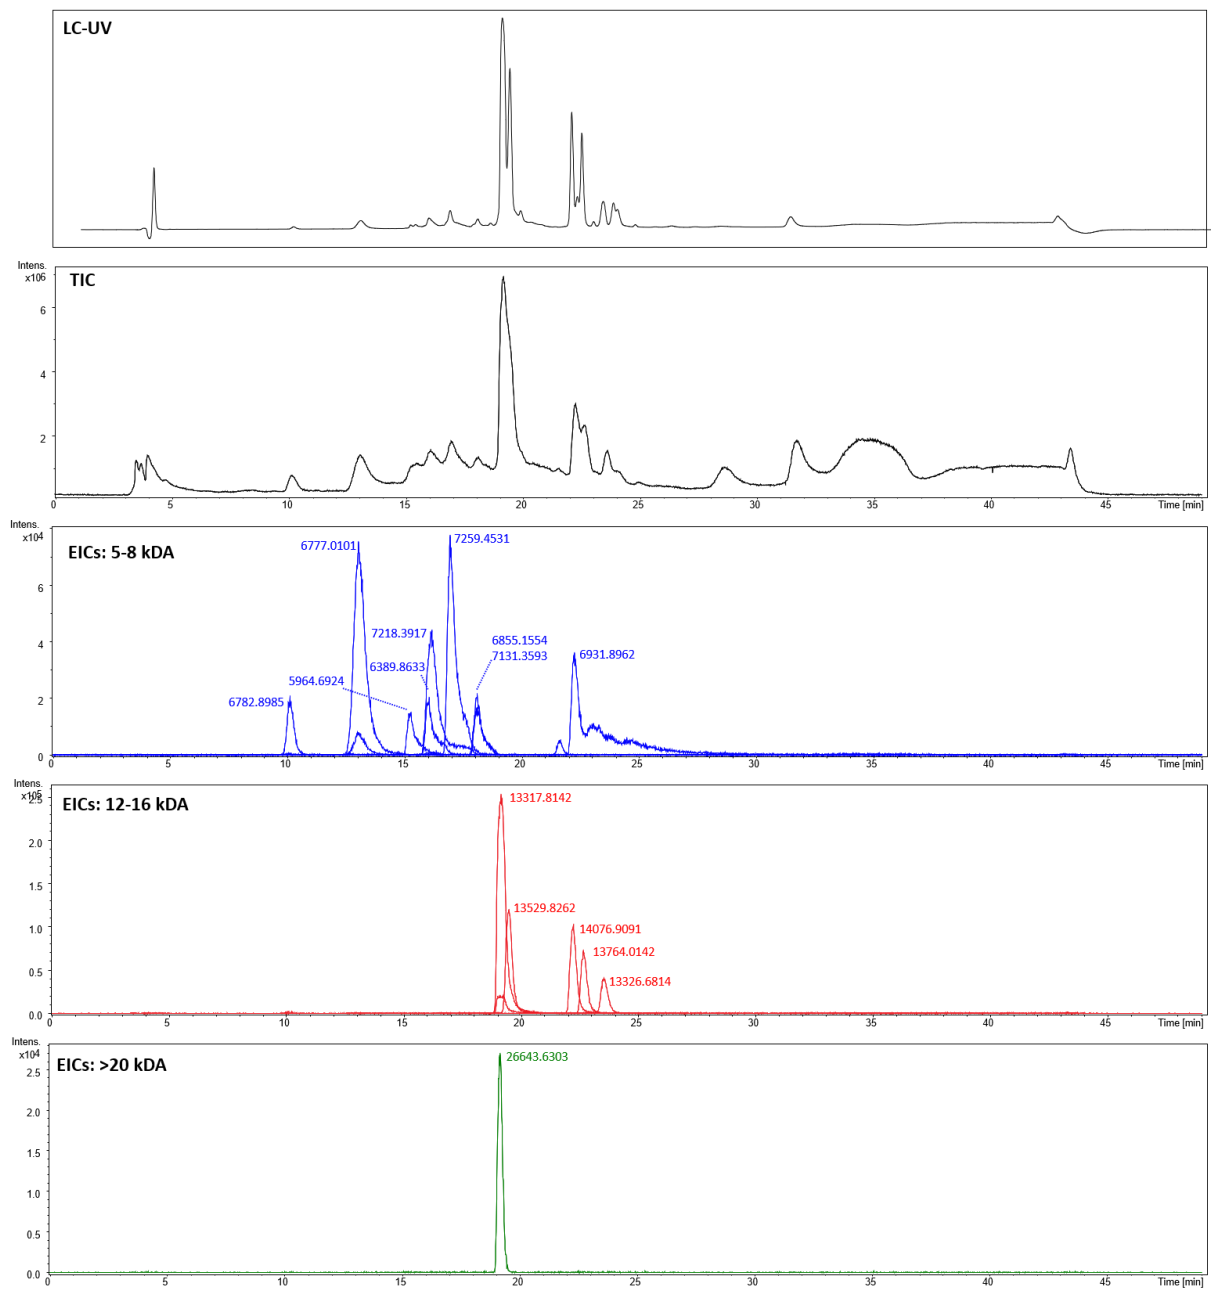

**Supplementary Figure S7.** LC-UV-MS chromatogram alignments highlight the abundant venom toxins in *Oxyuranus scutellatus* (OS786) venom. LC-UV peaks indicate the relative protein abundance following separation. TIC shows the summary of all measured intensities. EICs display the extracted, high-abundant masses in the venom. EICs are sorted based on their mass range to enhance visibility (i.e., mass ranges of 5-8 kDa, 12-16 kDa and >20 kDa). Key: LC-UV, liquid chromatography coupled to ultraviolet detection; TIC, Total Ion Chromatogram; EICs, Extracted Ion Chromatograms; MS, mass spectrometry.

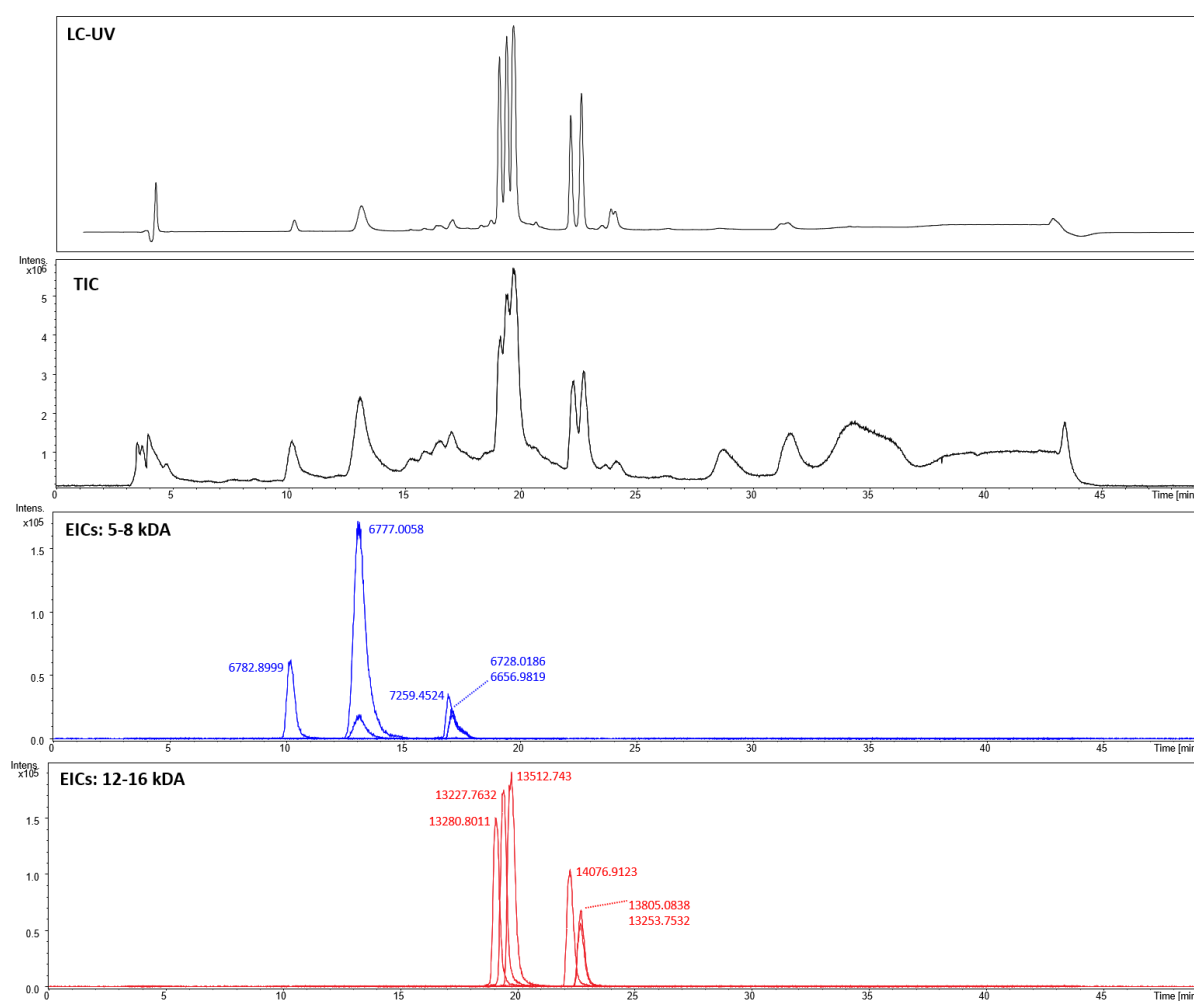

**Supplementary Figure S8.** LC-UV-MS chromatogram alignments highlight the abundant venom toxins in *Oxyuranus scutellatus* (OS371) venom. LC-UV peaks indicate the relative protein abundance following separation. TIC shows the summary of all measured intensities. EICs display the extracted, high-abundant masses in the venom. EICs are sorted based on their mass range to enhance visibility (i.e., mass ranges of 5-8 kDa and 12-16 kDa). Key: LC-UV, liquid chromatography coupled to ultraviolet detection; TIC, Total Ion Chromatogram; EICs, Extracted Ion Chromatograms; MS, mass spectrometry.

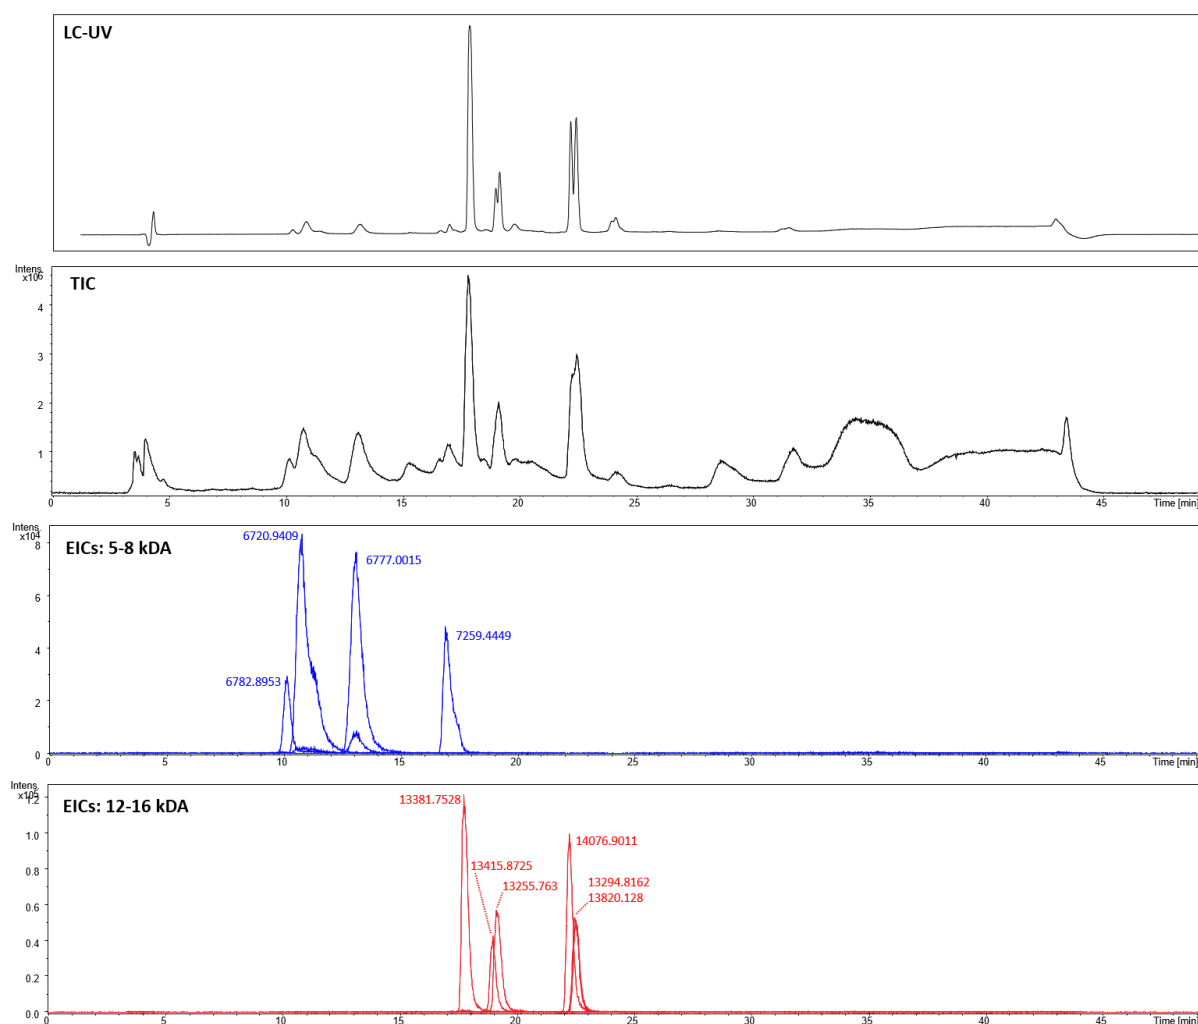

**Supplementary Figure S9.** LC-UV-MS chromatogram alignments highlight the abundant venom toxins in *Oxyuranus scutellatus* (OS787) venom. LC-UV peaks indicate the relative protein abundance following separation. TIC shows the summary of all measured intensities. EICs display the extracted, high-abundant masses in the venom. EICs are sorted based on their mass range to enhance visibility (i.e., mass ranges of 5-8 kDa and 12-16 kDa). Key: LC-UV, liquid chromatography coupled to ultraviolet detection; TIC, Total Ion Chromatogram; EICs, Extracted Ion Chromatograms; MS, mass spectrometry.

*Oxyuranus scutellatus* - Mt Molloy (OS785)

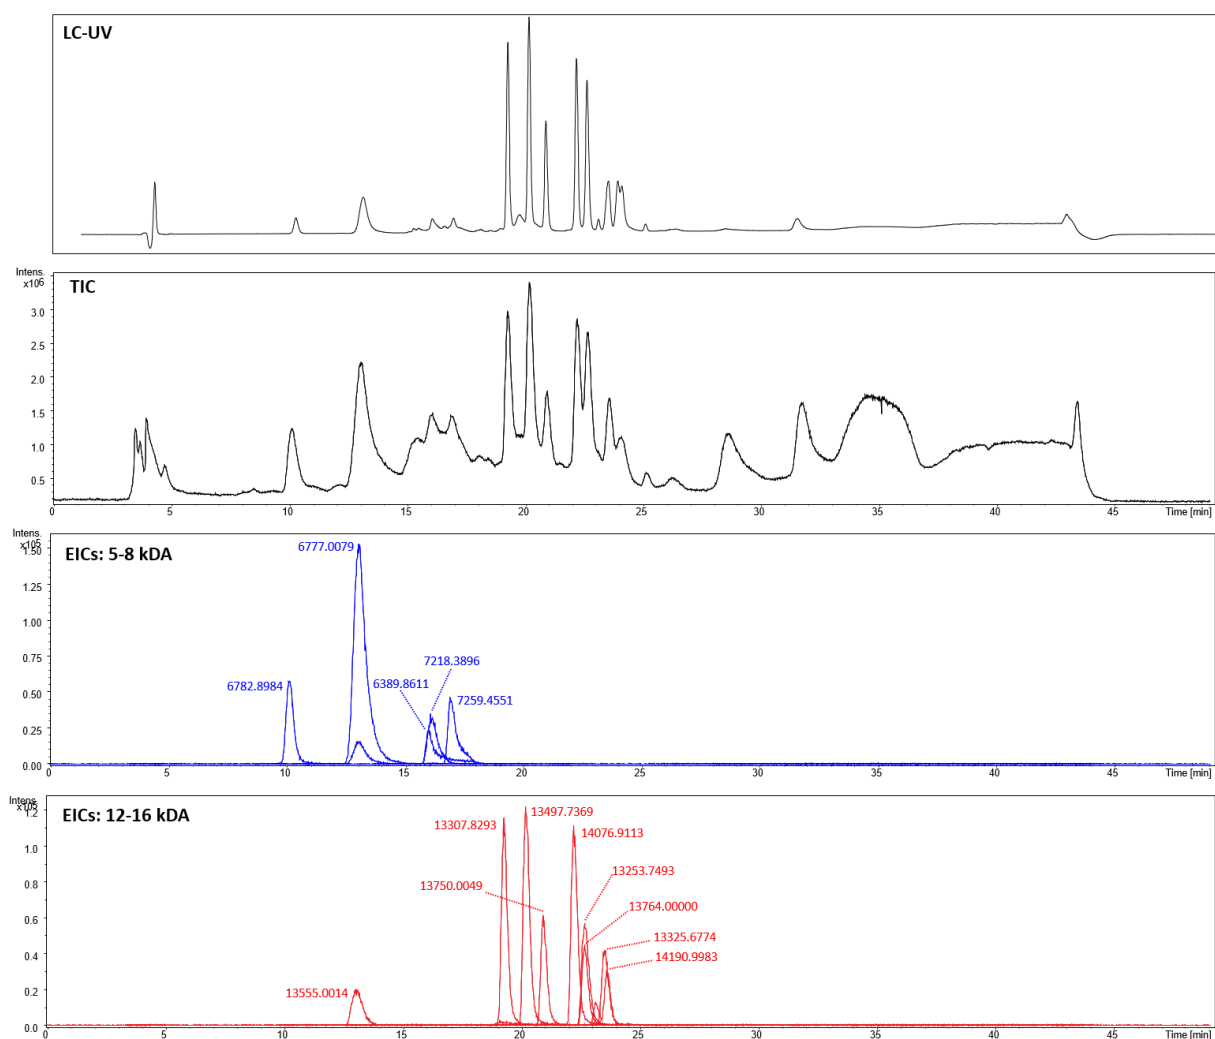

**Supplementary Figure S10.** LC-UV-MS chromatogram alignments highlight the abundant venom toxins in *Oxyuranus scutellatus* (OS785) venom. LC-UV peaks indicate the relative protein abundance following separation. TIC shows the summary of all measured intensities. EICs display the extracted, high-abundant masses in the venom. EICs are sorted based on their mass range to enhance visibility (i.e., mass ranges of 5-8 kDa and 12-16 kDa). Key: LC-UV, liquid chromatography coupled to ultraviolet detection; TIC, Total Ion Chromatogram; EICs, Extracted Ion Chromatograms; MS, mass spectrometry.

*Oxyuranus scutellatus* – Northern Territory (OS844)

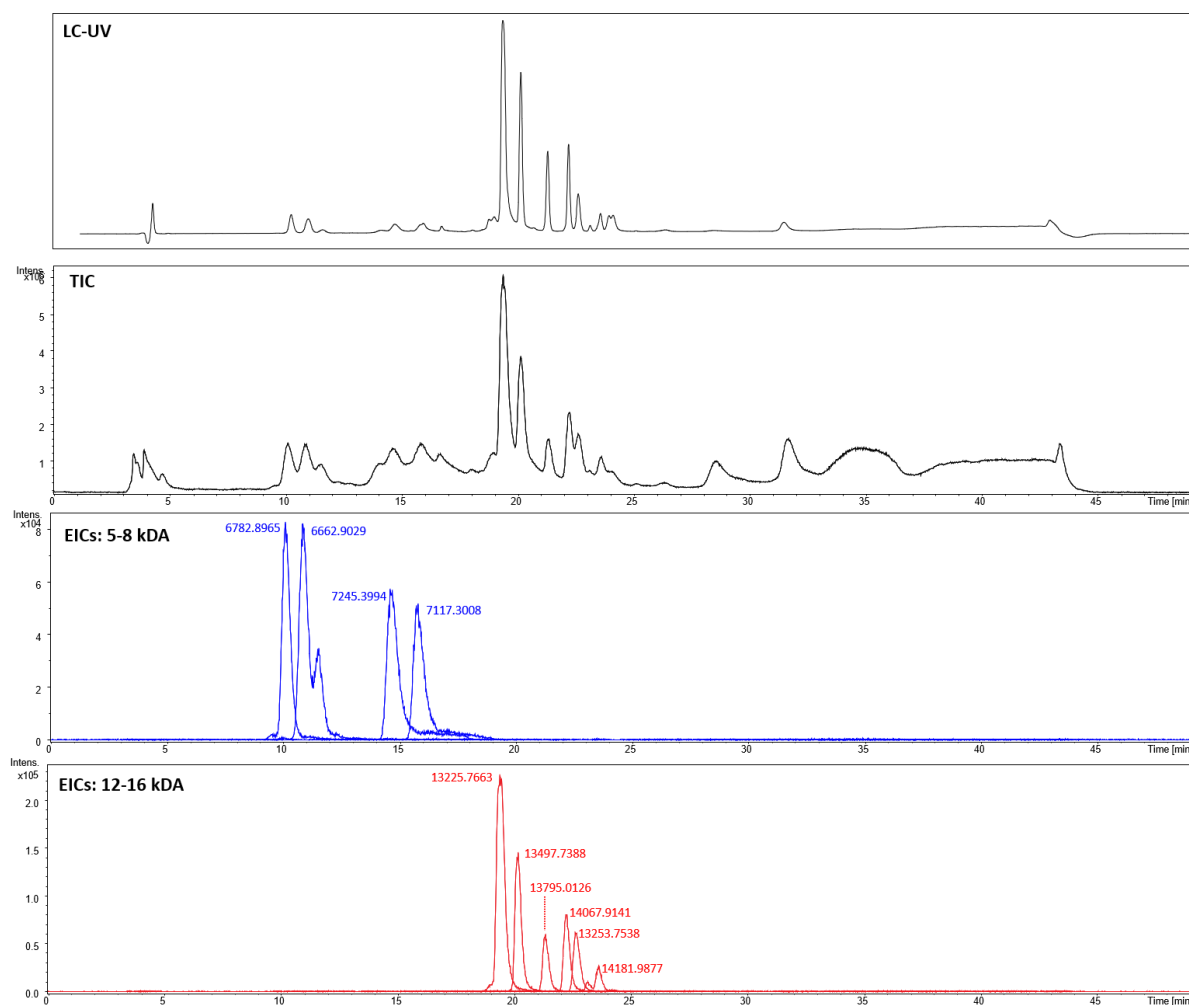

**Supplementary Figure S11.** LC-UV-MS chromatogram alignments highlight the abundant venom toxins in *Oxyuranus scutellatus* (OS844) venom. LC-UV peaks indicate the relative protein abundance following separation. TIC shows the summary of all measured intensities. EICs display the extracted, high-abundant masses in the venom. EICs are sorted based on their mass range to enhance visibility (i.e., mass ranges of 5-8 kDa and 12-16 kDa). Key: LC-UV, liquid chromatography coupled to ultraviolet detection; TIC, Total Ion Chromatogram; EICs, Extracted Ion Chromatograms; MS, mass spectrometry.

*Oxyuranus scutellatus canni* - Merauke (OS842)

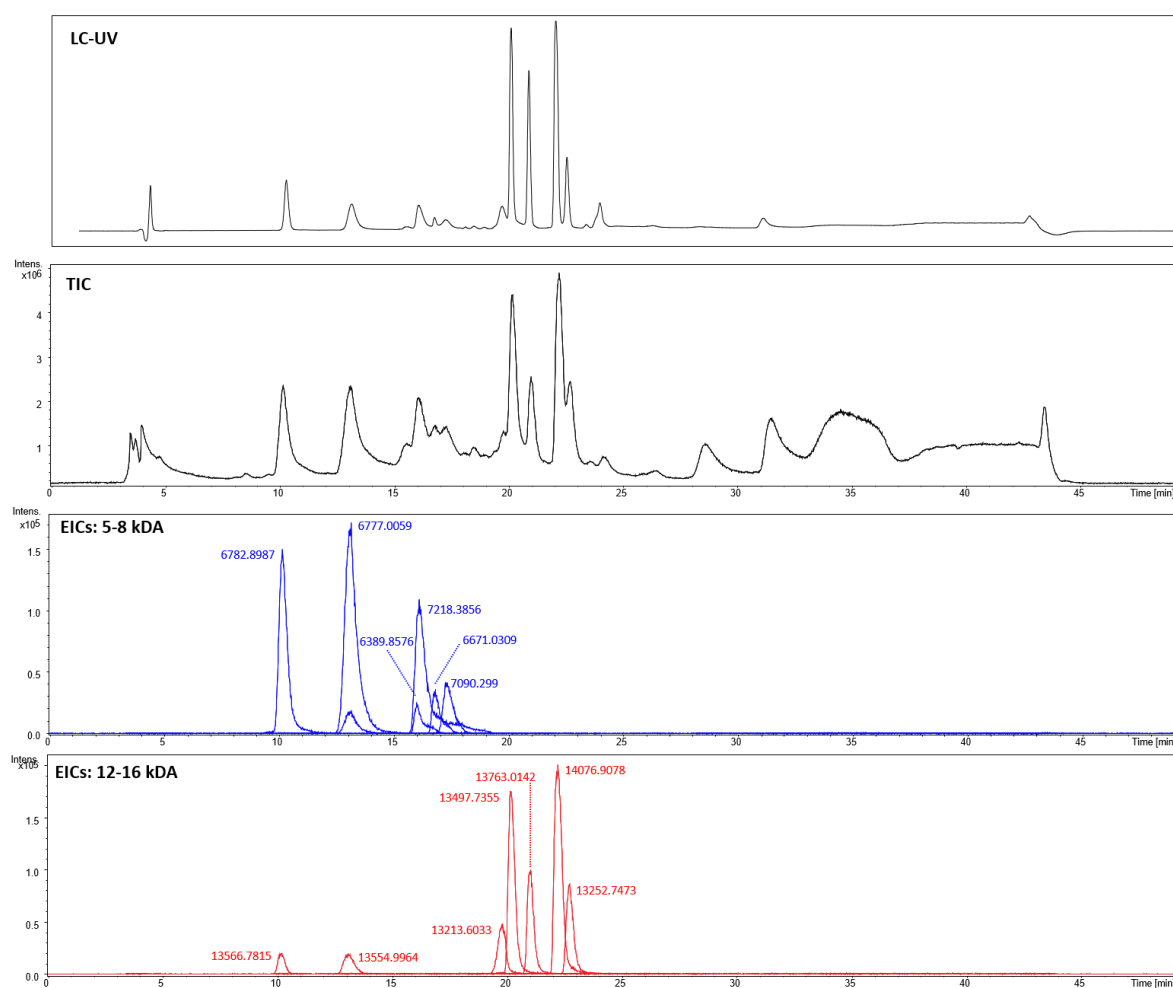

**Supplementary Figure S12.** LC-UV-MS chromatogram alignments highlight the abundant venom toxins in *Oxyuranus scutellatus canni* (OS842) venom. LC-UV peaks indicate the relative protein abundance following separation. TIC shows the summary of all measured intensities. EICs display the extracted, high-abundant masses in the venom. EICs are sorted based on their mass range to enhance visibility (i.e., mass ranges of 5-8 kDa and 12-16 kDa). Key: LC-UV, liquid chromatography coupled to ultraviolet detection; TIC, Total Ion Chromatogram; EICs, Extracted Ion Chromatograms; MS, mass spectrometry.

*Oxyuranus scutellatus canni* - Saibai Island (OSC4)

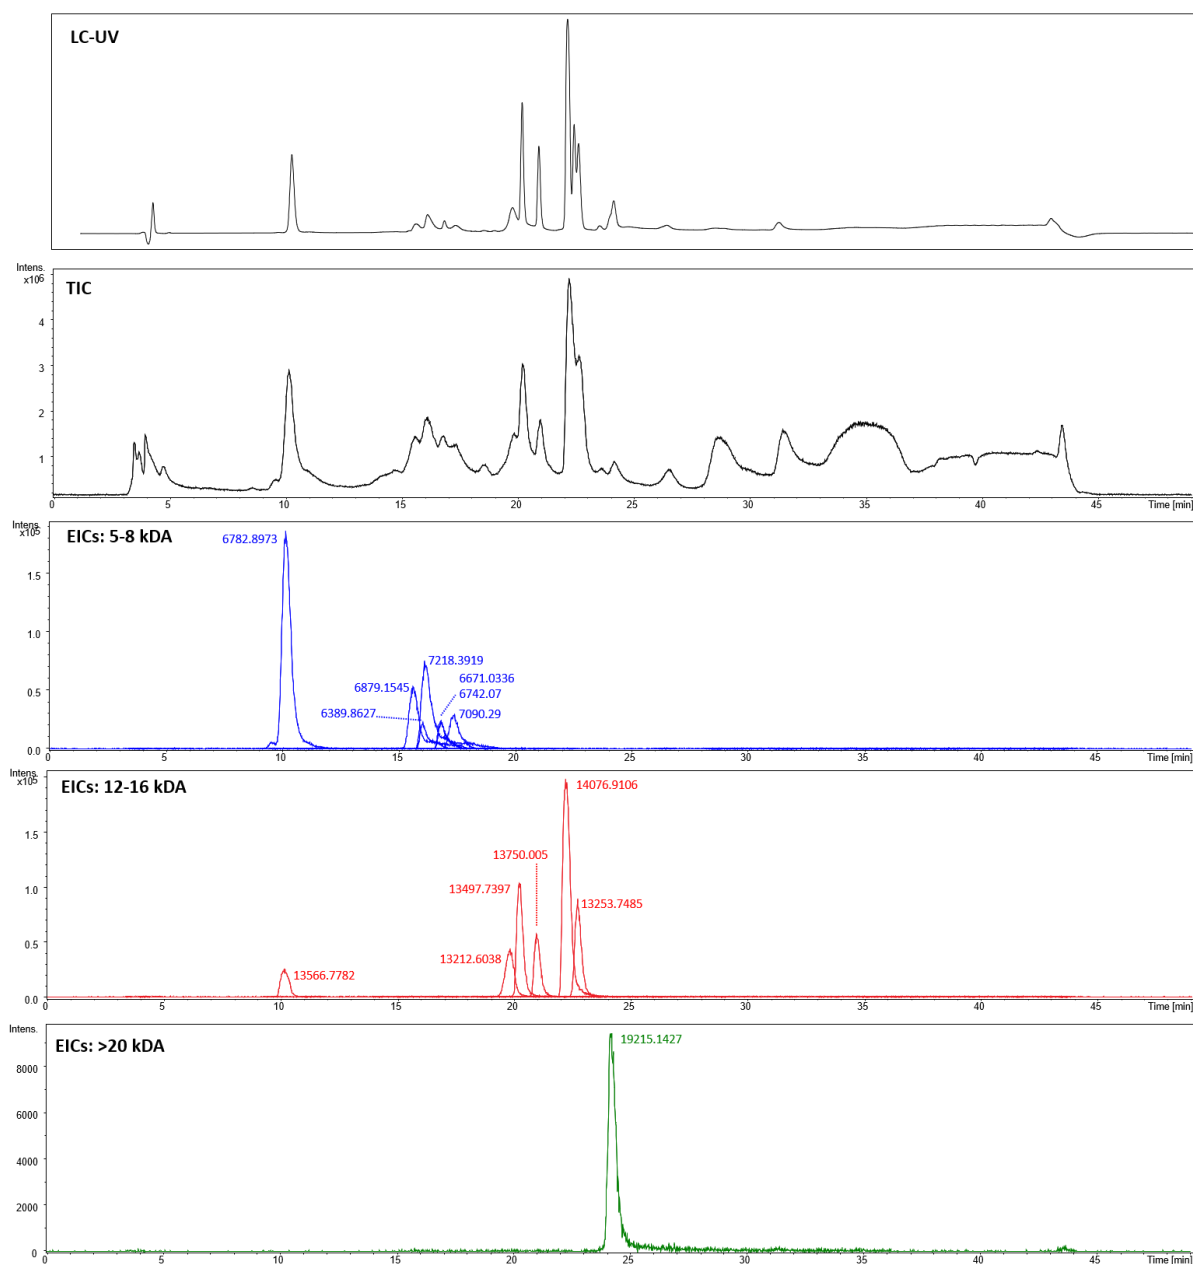

**Supplementary Figure S13.** LC-UV-MS chromatogram alignments highlight the abundant venom toxins in *Oxyuranus scutellatus canni* (OSC4) venom. LC-UV peaks indicate the relative protein abundance following separation. TIC shows the summary of all measured intensities. EICs display the extracted, high-abundant masses in the venom. EICs are sorted based on their mass range to enhance visibility (i.e., mass ranges of 5-8 kDa, 12-16 kDa and >20 kDa). Key: LC-UV, liquid chromatography coupled to ultraviolet detection; TIC, Total Ion Chromatogram; EICs, Extracted Ion Chromatograms; MS, mass spectrometry.



*Oxyuranus scutellatus canni* - Saibai Island (OSC7)

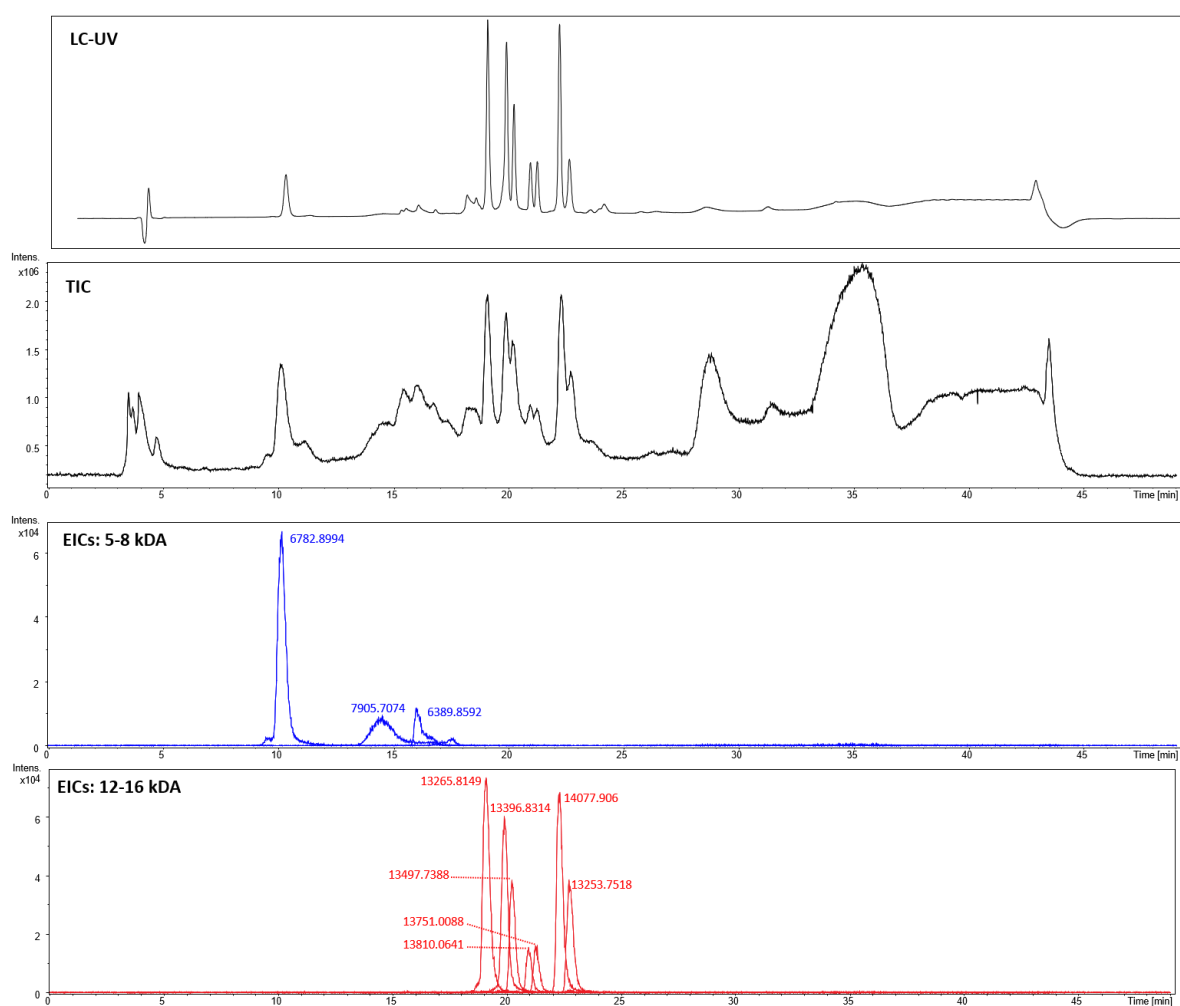

**Supplementary Figure S14.** LC-UV-MS chromatogram alignments highlight the abundant venom toxins in *Oxyuranus scutellatus canni* (OSC7) venom. LC-UV peaks indicate the relative protein abundancy following separation. TIC shows the summary of all measured intensities. EICs display the extracted, high-abundant masses in the venom. EICs are sorted based on their mass range to enhance visibility (i.e., mass ranges of 5-8 kDa and 12-16 kDa). Key: LC-UV, liquid chromatography coupled to ultraviolet detection; TIC, Total Ion Chromatogram; EICs, Extracted Ion Chromatograms; MS, mass spectrometry.

*Pseudonaja affinis* - Smokey Bay (PF30)

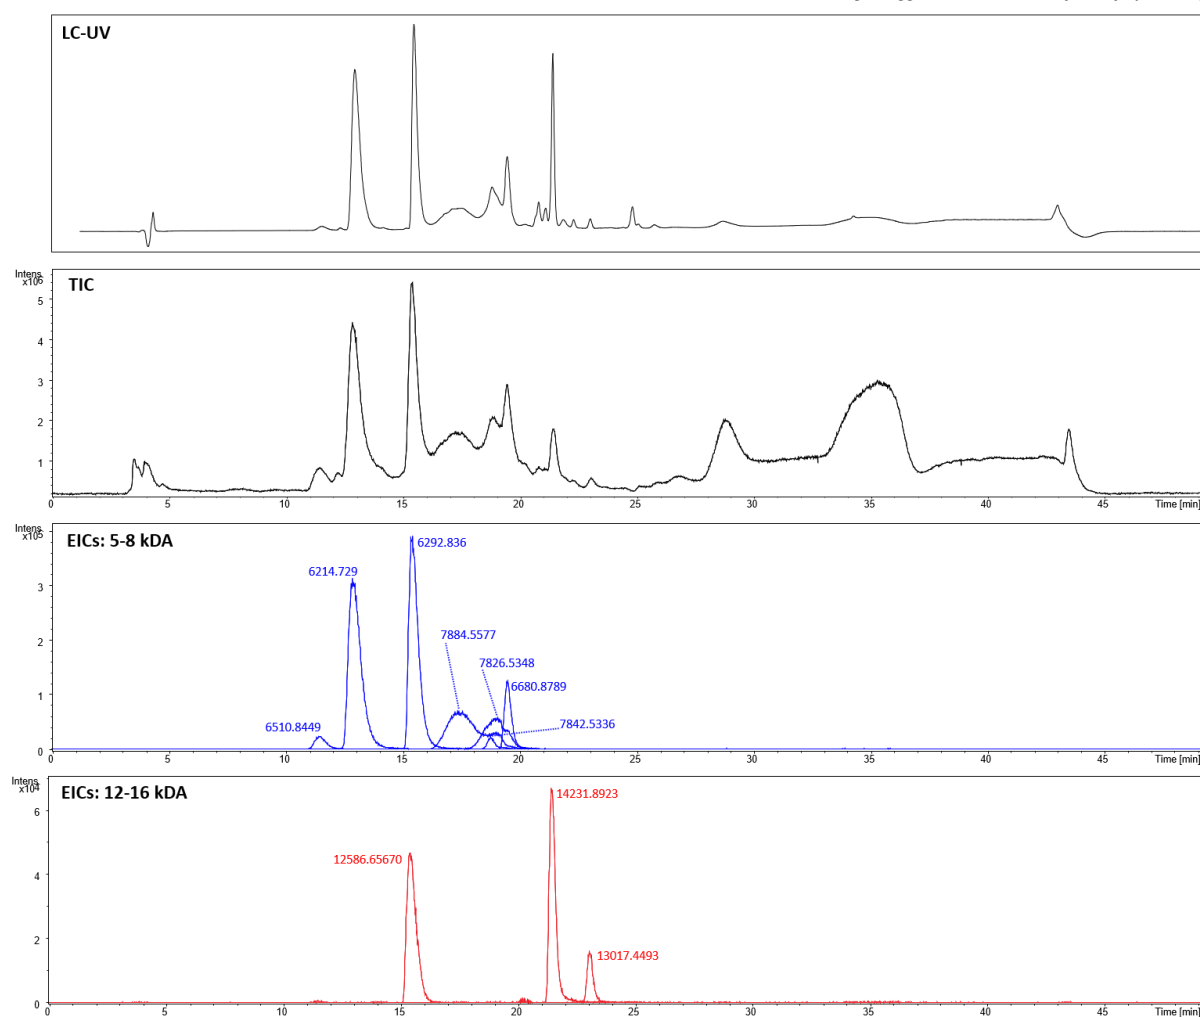

**Supplementary Figure S15.** LC-UV-MS chromatogram alignments highlight the abundant venom toxins in *Pseudonaja affinis* (PF30) venom. LC-UV peaks indicate the relative protein abundance following separation. TIC shows the summary of all measured intensities. EICs display the extracted, high-abundant masses in the venom. EICs are sorted based on their mass range to enhance visibility (i.e., mass ranges of 5-8 kDa and 12-16 kDa). Key: LC-UV, liquid chromatography coupled to ultraviolet detection; TIC, Total Ion Chromatogram; EICs, Extracted Ion Chromatograms; MS, mass spectrometry.

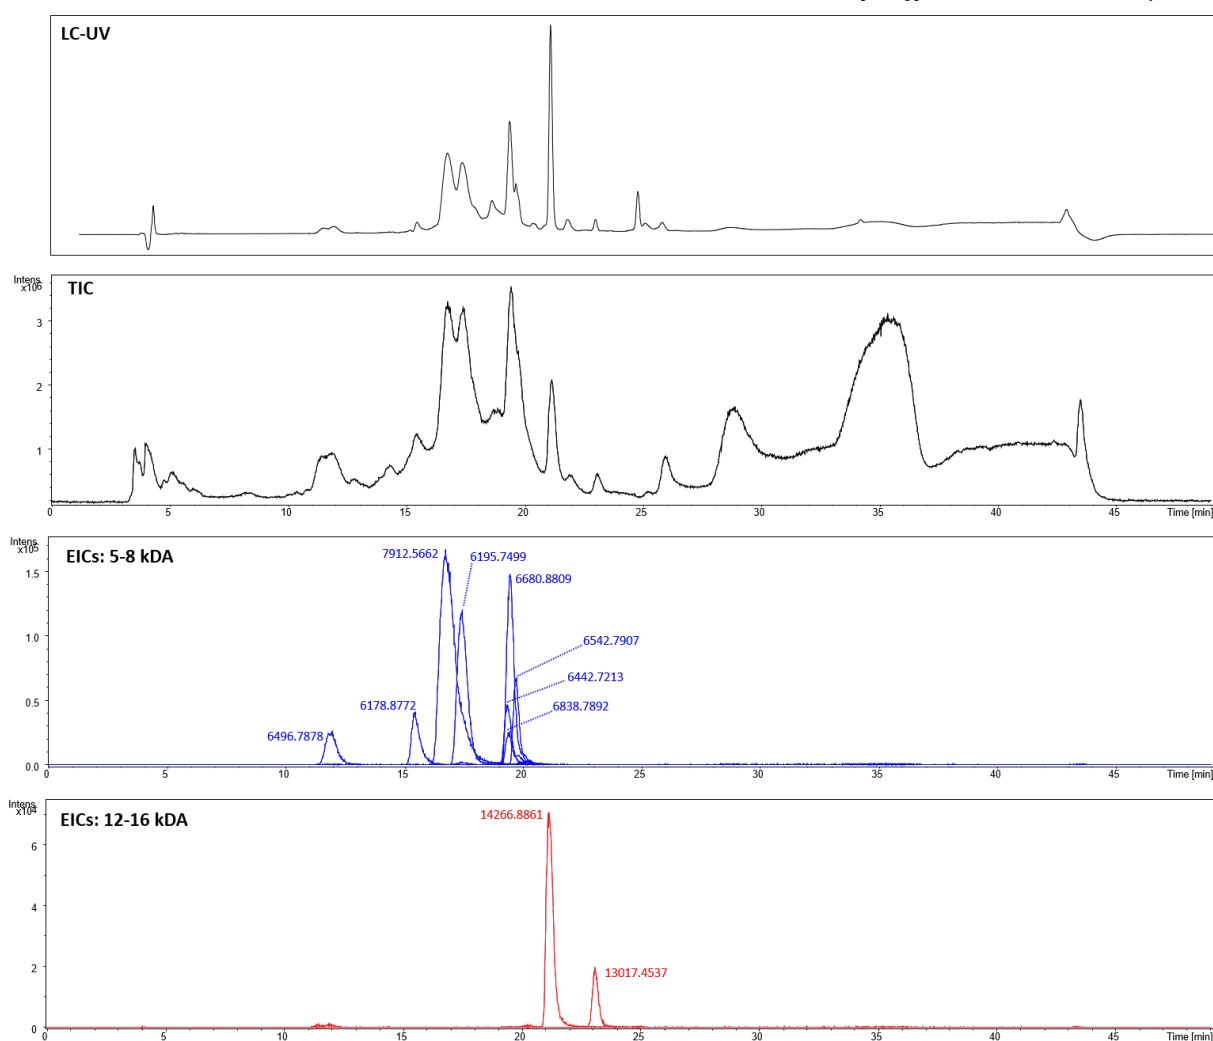

**Supplementary Figure S16.** LC-UV-MS chromatogram alignments highlight the abundant venom toxins in *Pseudonaja affinis* (PF23) venom. LC-UV peaks indicate the relative protein abundance following separation. TIC shows the summary of all measured intensities. EICs display the extracted, high-abundant masses in the venom. EICs are sorted based on their mass range to enhance visibility (i.e., mass ranges of 5-8 kDa and 12-16 kDa). Key: LC-UV, liquid chromatography coupled to ultraviolet detection; TIC, Total Ion Chromatogram; EICs, Extracted Ion Chromatograms; MS, mass spectrometry.

*Pseudonaja aspidorhyncha* - Middleback Ranges (PAS22)

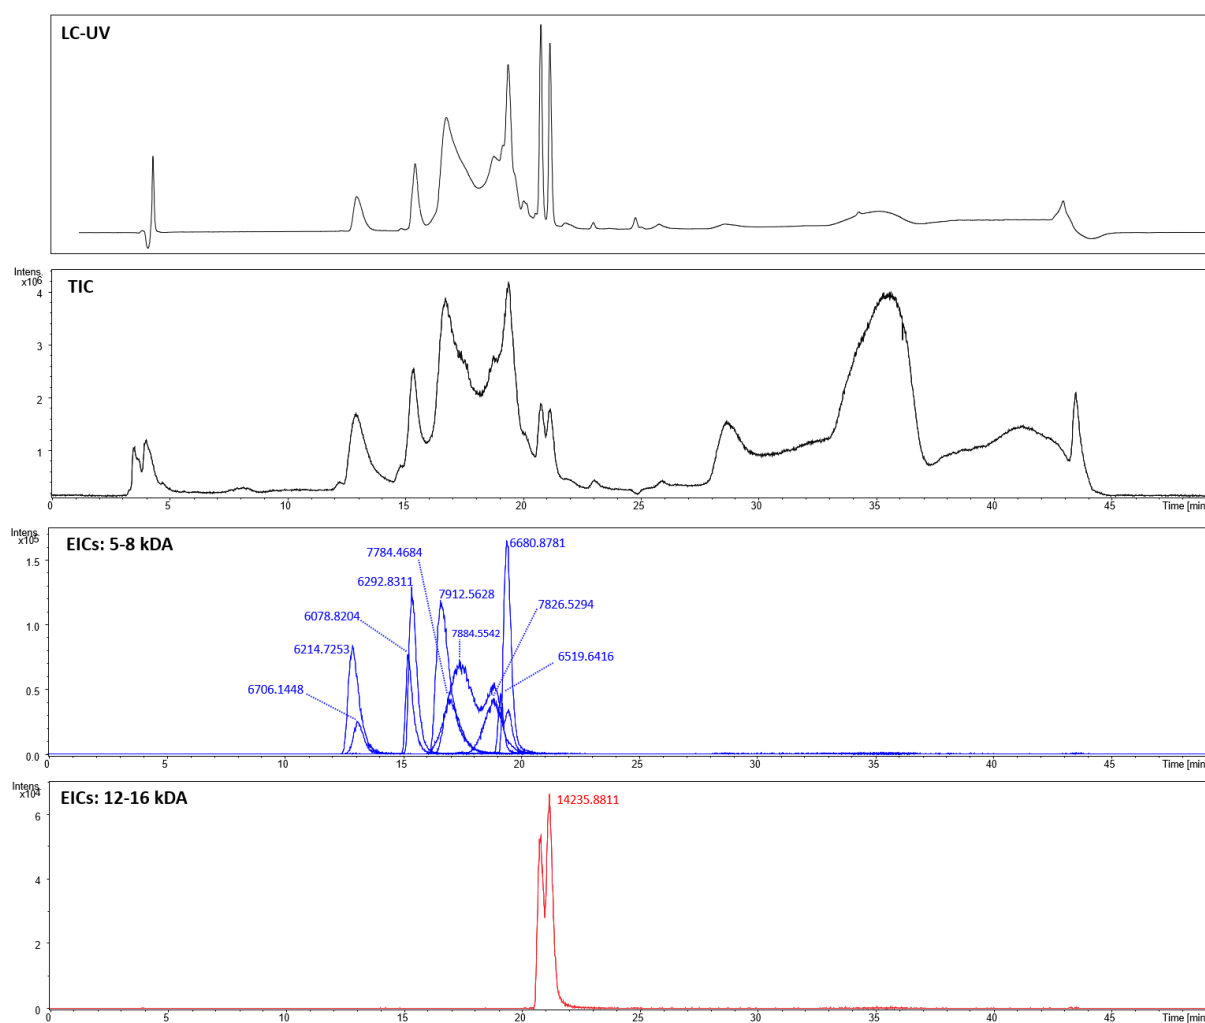

**Supplementary Figure S17.** LC-UV-MS chromatogram alignments highlight the abundant venom toxins in *Pseudonaja aspidorhyncha* (PAS22) venom. LC-UV peaks indicate the relative protein abundance following separation. TIC shows the summary of all measured intensities. EICs display the extracted, high-abundant masses in the venom. EICs are sorted based on their mass range to enhance visibility (i.e., mass ranges of 5-8 kDa and 12-16 kDa). Key: LC-UV, liquid chromatography coupled to ultraviolet detection; TIC, Total Ion Chromatogram; EICs, Extracted Ion Chromatograms; MS, mass spectrometry.

*Pseudonaja aspidorhyncha* - Streaky Bay (PAS32)

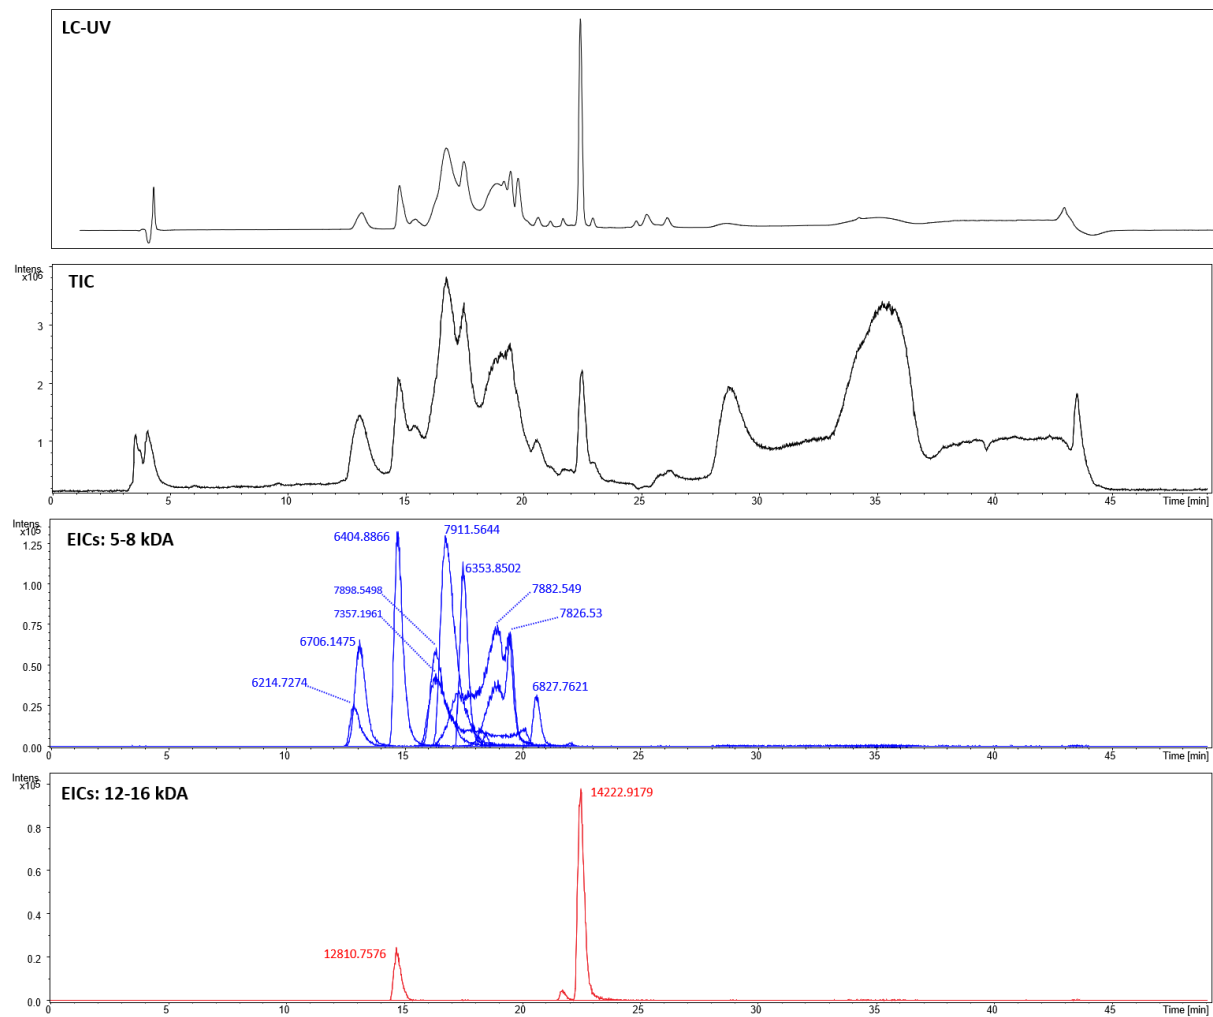

**Supplementary Figure S18.** LC-UV-MS chromatogram alignments highlight the abundant venom toxins in *Pseudonaja aspidorhyncha* (PAS32) venom. LC-UV peaks indicate the relative protein abundance following separation. TIC shows the summary of all measured intensities. EICs display the extracted, high-abundant masses in the venom. EICs are sorted based on their mass range to enhance visibility (i.e., mass ranges of 5-8 kDa and 12-16 kDa). Key: LC-UV, liquid chromatography coupled to ultraviolet detection; TIC, Total Ion Chromatogram; EICs, Extracted Ion Chromatograms; MS, mass spectrometry.

*Pseudonaja aspidorhyncha* - Witchelina (PAS25)

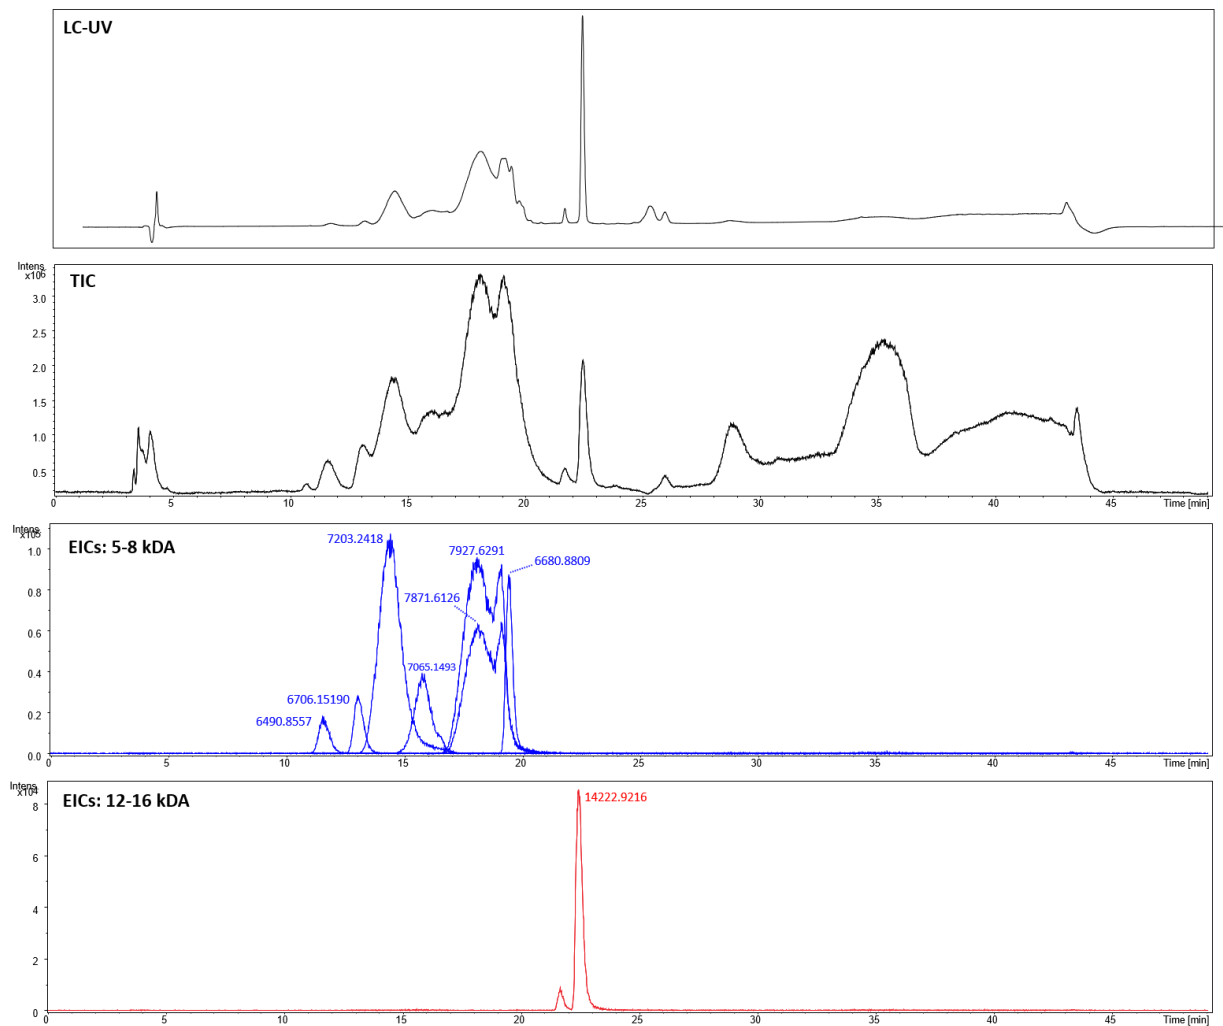

**Supplementary Figure S19.** LC-UV-MS chromatogram alignments highlight the abundant venom toxins in *Pseudonaja aspidorhyncha* (PAS25) venom. LC-UV peaks indicate the relative protein abundance following separation. TIC shows the summary of all measured intensities. EICs display the extracted, high-abundant masses in the venom. EICs are sorted based on their mass range to enhance visibility (i.e., mass ranges of 5-8 kDa and 12-16 kDa). Key: LC-UV, liquid chromatography coupled to ultraviolet detection; TIC, Total Ion Chromatogram; EICs, Extracted Ion Chromatograms; MS, mass spectrometry.

*Pseudonaja guttata* - Longreach (SB22)

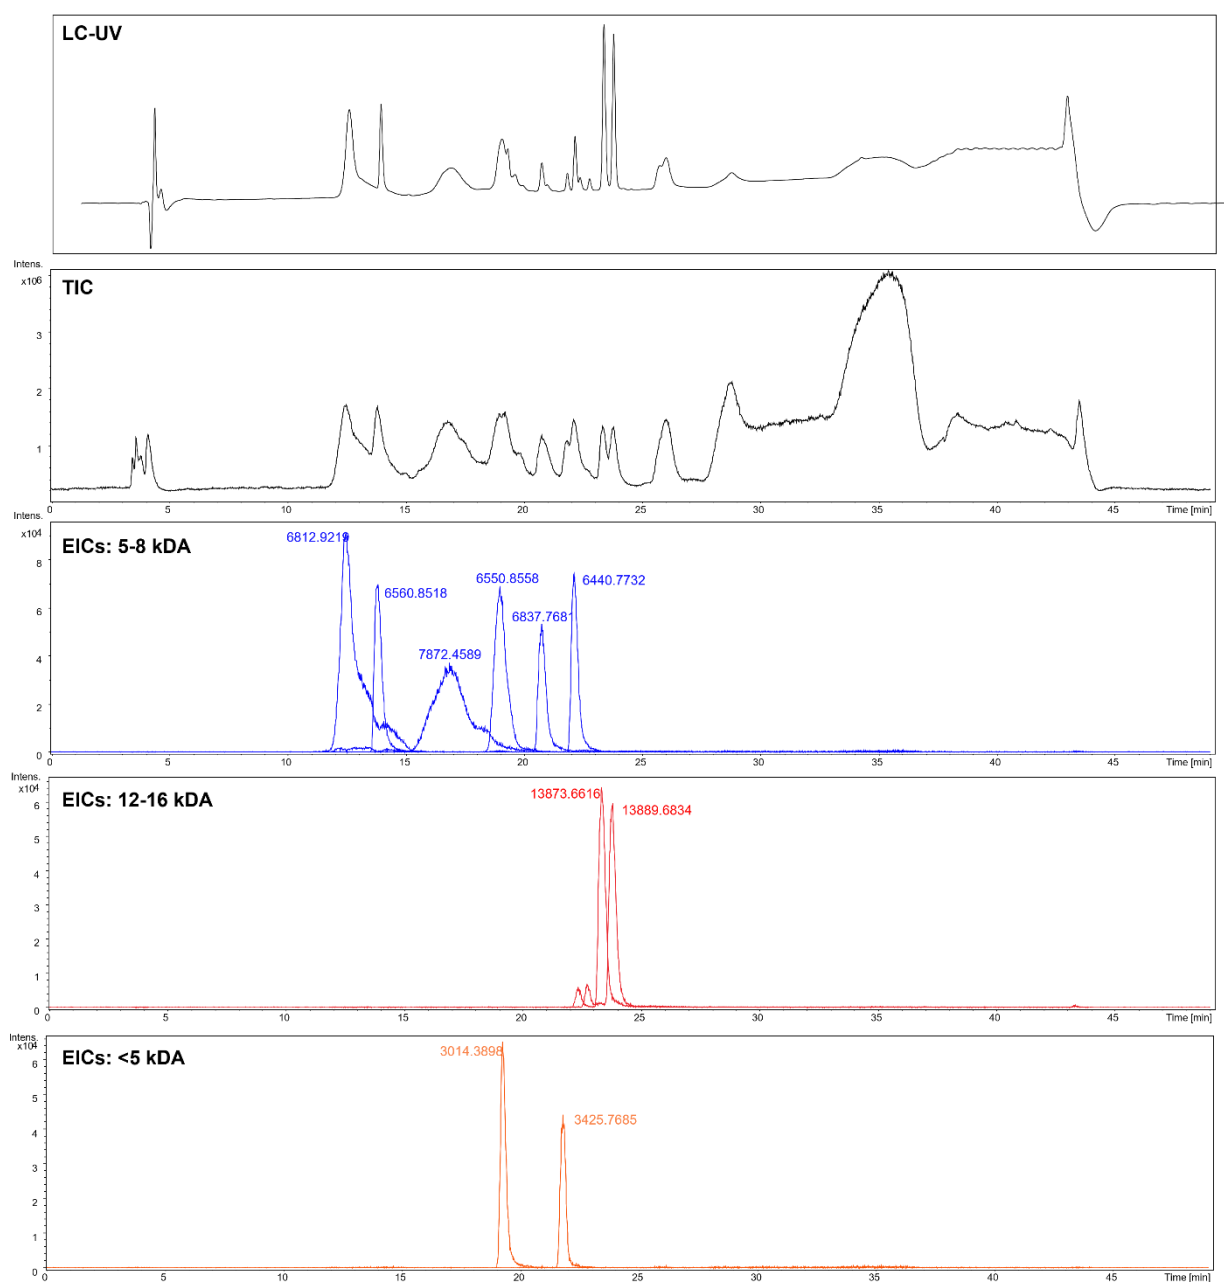

**Supplementary Figure S20.** LC-UV-MS chromatogram alignments highlight the abundant venom toxins in *Pseudonaja guttata* (SB22) venom. LC-UV peaks indicate the relative protein abundance following separation. TIC shows the summary of all measured intensities. EICs display the extracted, high-abundant masses in the venom. EICs are sorted based on their mass range to enhance visibility (i.e., mass ranges of 5-8 kDa, 12-16 kDa and <5 kDa). Key: LC-UV, liquid chromatography coupled to ultraviolet detection; TIC, Total Ion Chromatogram; EICs, Extracted Ion Chromatograms; MS, mass spectrometry.

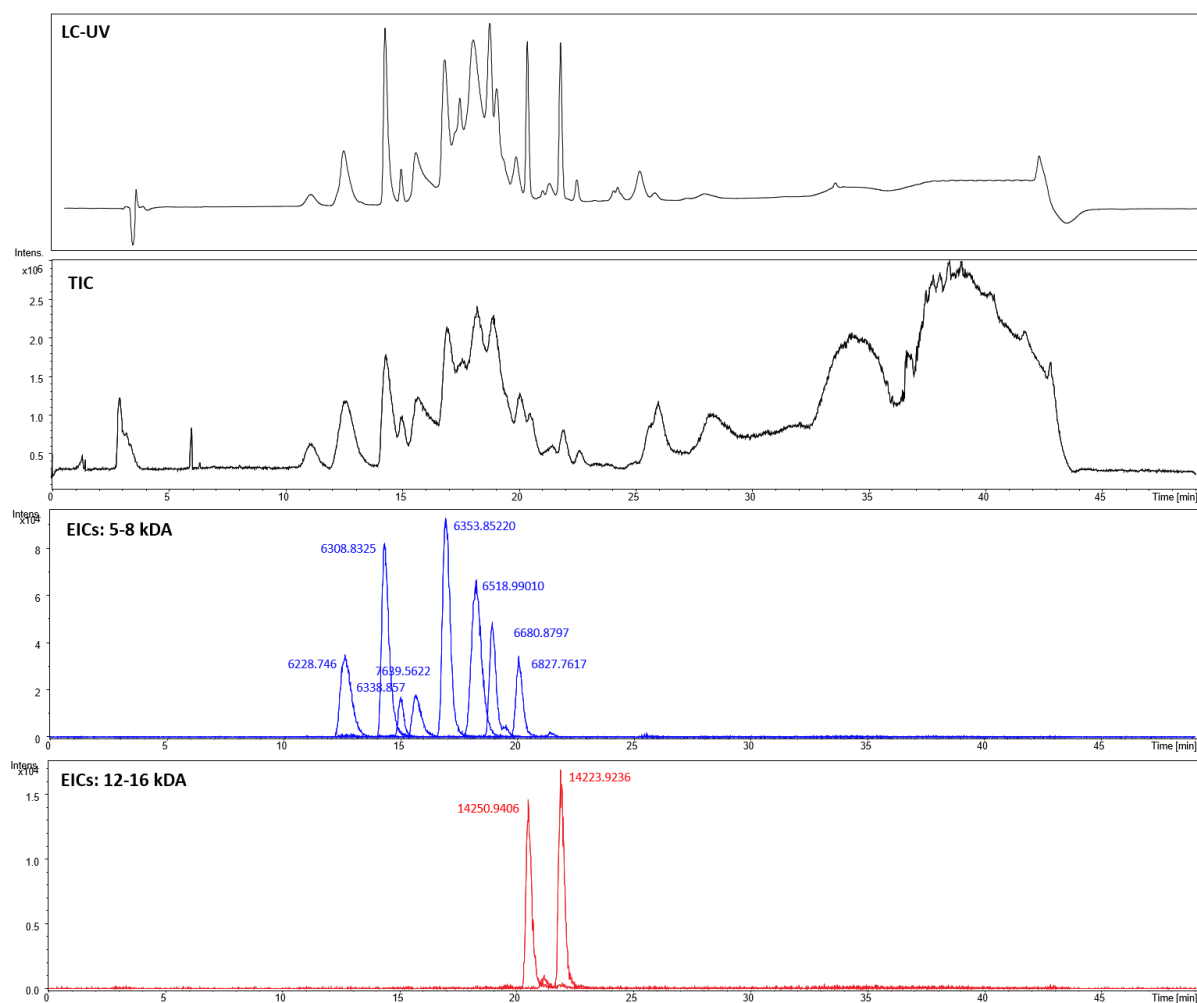

**Supplementary Figure S21.** LC-UV-MS chromatogram alignments highlight the abundant venom toxins in *Pseudonaja inframacula* (PI22) venom. LC-UV peaks indicate the relative protein abundance following separation. TIC shows the summary of all measured intensities. EICs display the extracted, high-abundant masses in the venom. EICs are sorted based on their mass range to enhance visibility (i.e., mass ranges of 5-8 kDa and 12-16 kDa). Key: LC-UV, liquid chromatography coupled to ultraviolet detection; TIC, Total Ion Chromatogram; EICs, Extracted Ion Chromatograms; MS, mass spectrometry.



*Pseudonaja ingrami* - Barkly (PIN8)

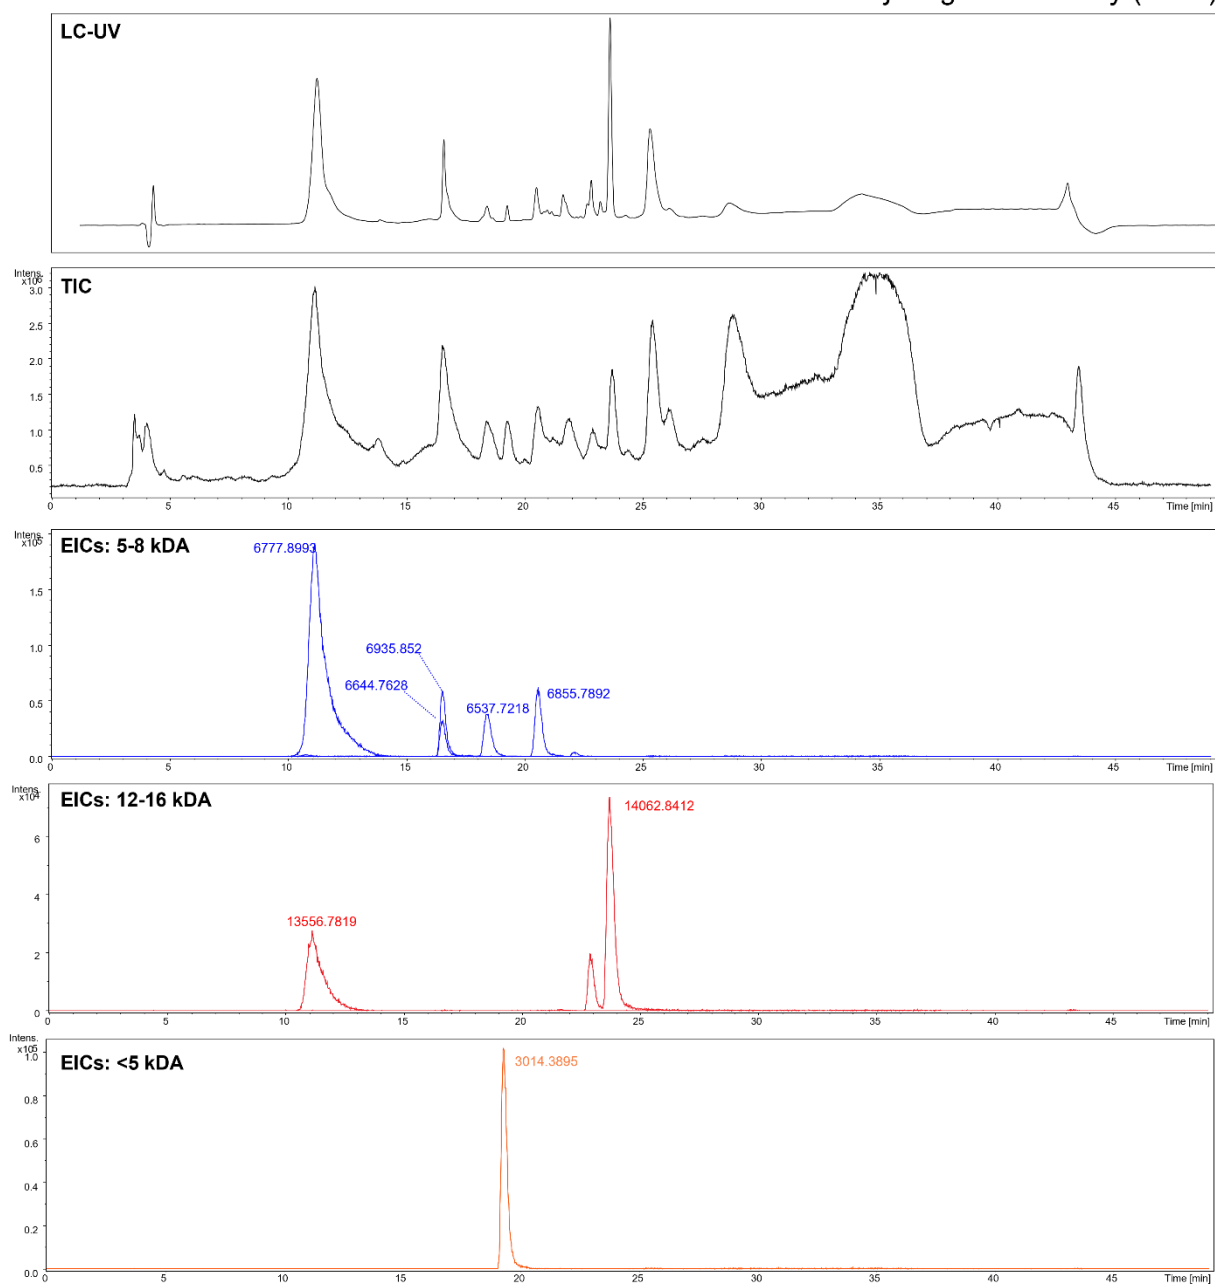

**Supplementary Figure S22.** LC-UV-MS chromatogram alignments highlight the abundant venom toxins in *Pseudonaja ingrami* (PIN8) venom. LC-UV peaks indicate the relative protein abundance following separation. TIC shows the summary of all measured intensities. EICs display the extracted, high-abundant masses in the venom. EICs are sorted based on their mass range to enhance visibility (i.e., mass ranges of 5-8 kDa, 12-16 kDa and <5 kDa). Key: LC-UV, liquid chromatography coupled to ultraviolet detection; TIC, Total Ion Chromatogram; EICs, Extracted Ion Chromatograms; MS, mass spectrometry.

*Pseudonaja mengdeni* - Boulia (PM6)

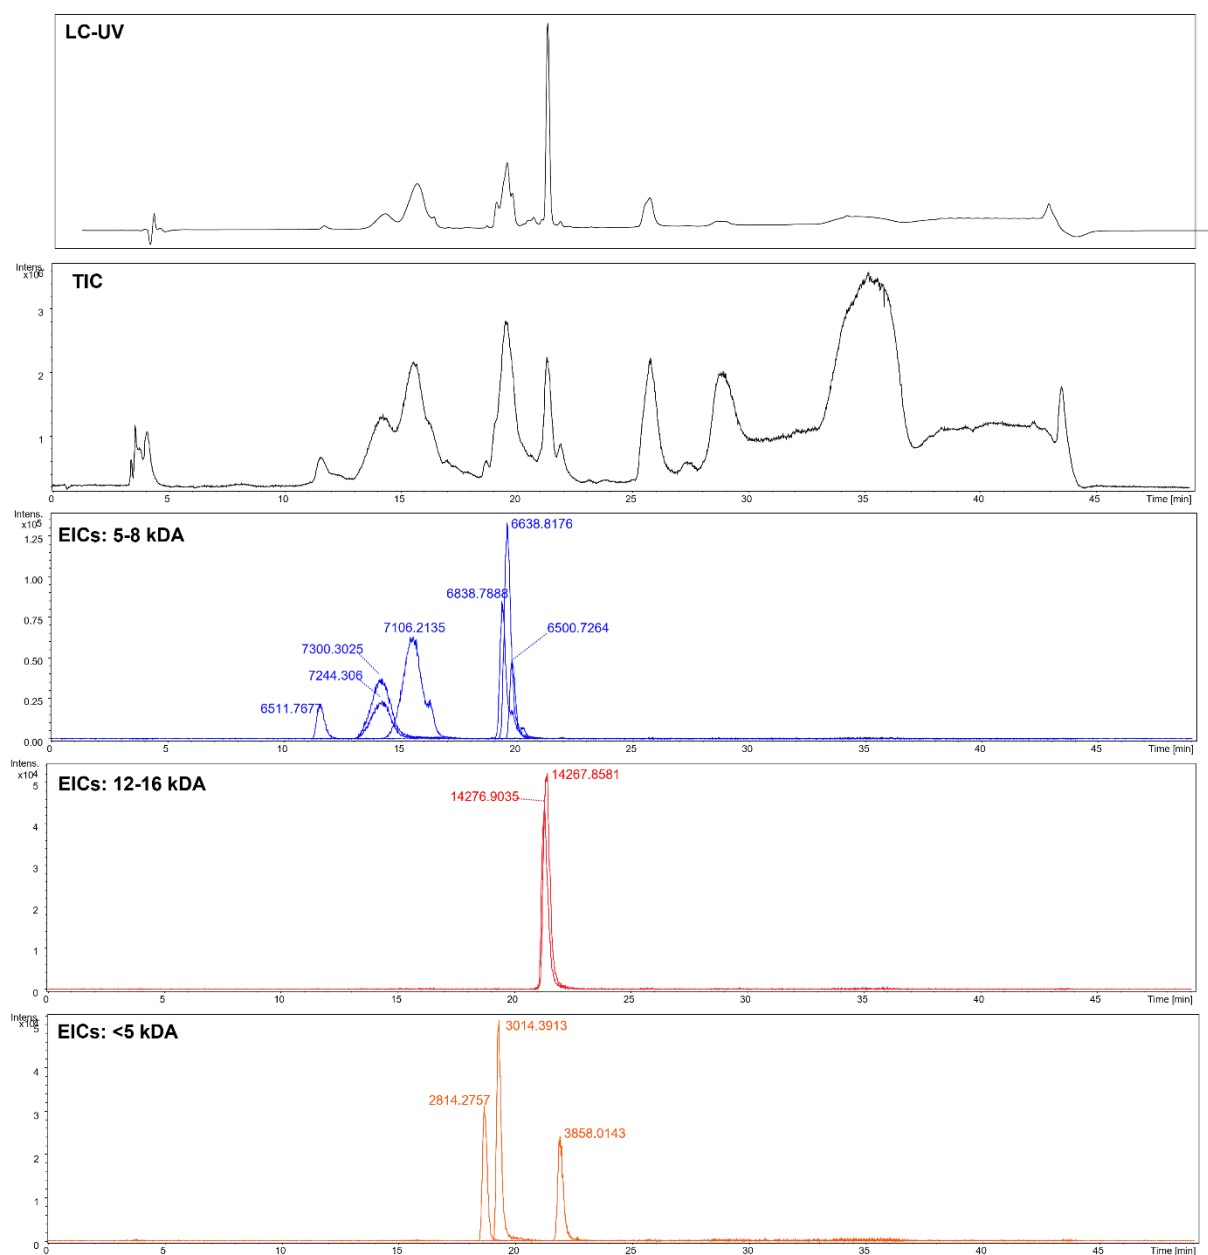

**Supplementary Figure S23.** LC-UV-MS chromatogram alignments highlight the abundant venom toxins in *Pseudonaja mengdeni* (PM6) venom. LC-UV peaks indicate the relative protein abundance following separation. TIC shows the summary of all measured intensities. EICs display the extracted, high-abundant masses in the venom. EICs are sorted based on their mass range to enhance visibility (i.e., mass ranges of 5-8 kDa, 12-16 kDa and <5 kDa). Key: LC-UV, liquid chromatography coupled to ultraviolet detection; TIC, Total Ion Chromatogram; EICs, Extracted Ion Chromatograms; MS, mass spectrometry.

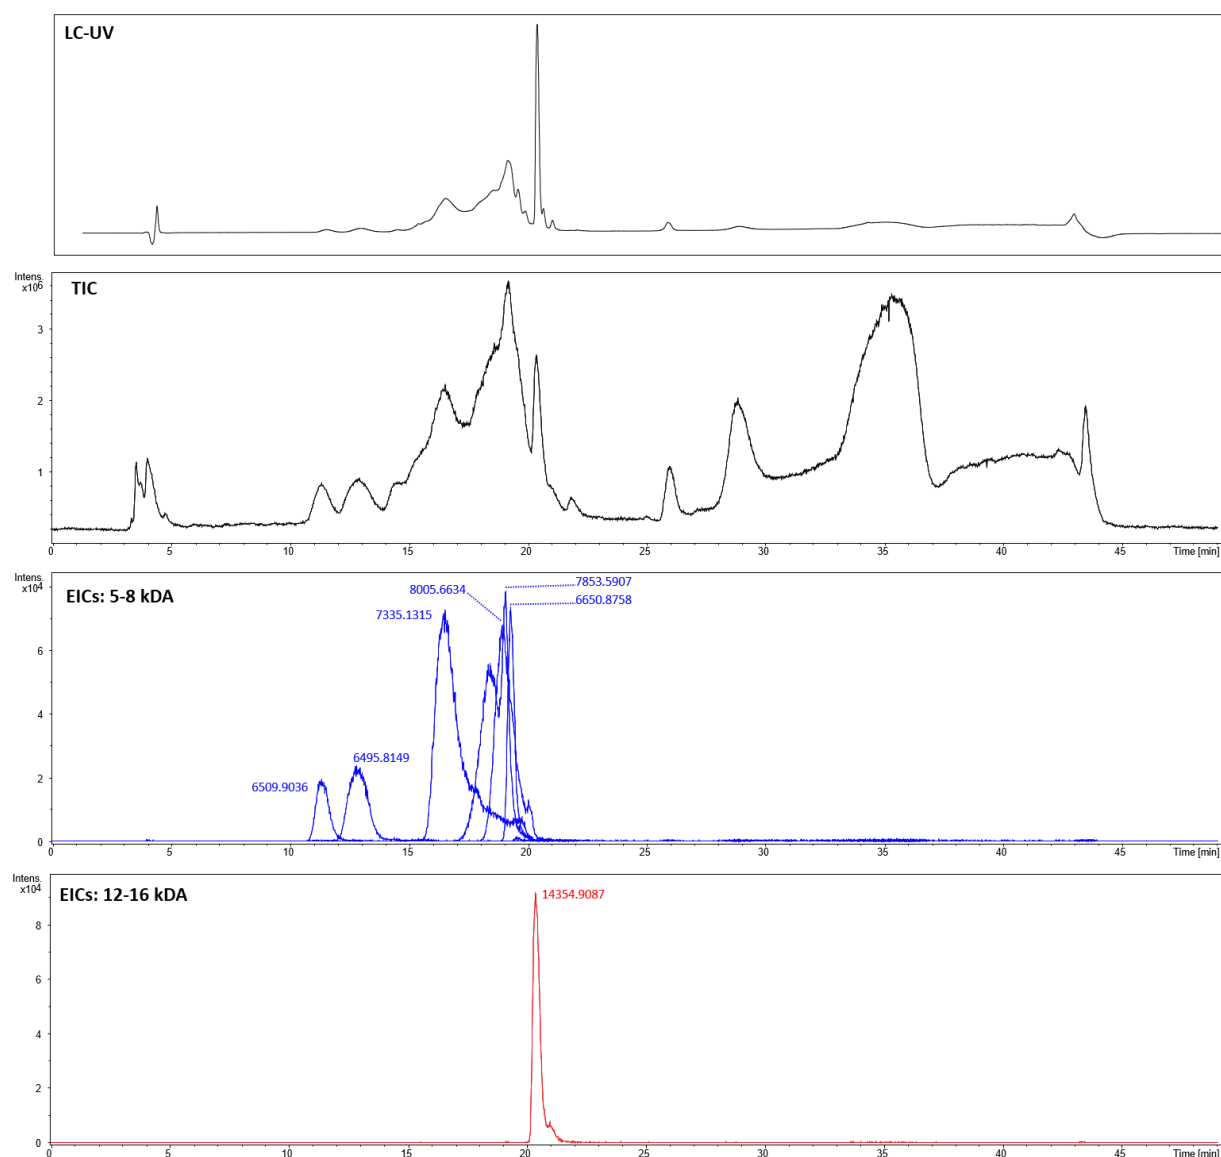

**Supplementary Figure S24.** LC-UV-MS chromatogram alignments highlight the abundant venom toxins in *Pseudonaja mengdeni* (PM8) venom. LC-UV peaks indicate the relative protein abundance following separation. TIC shows the summary of all measured intensities. EICs display the extracted, high-abundant masses in the venom. EICs are sorted based on their mass range to enhance visibility (i.e., mass ranges of 5-8 kDa and 12-16 kDa). Key: LC-UV, liquid chromatography coupled to ultraviolet detection; TIC, Total Ion Chromatogram; EICs, Extracted Ion Chromatograms; MS, mass spectrometry.

*Pseudonaja modesta* - Carnarvon (PMOD13)

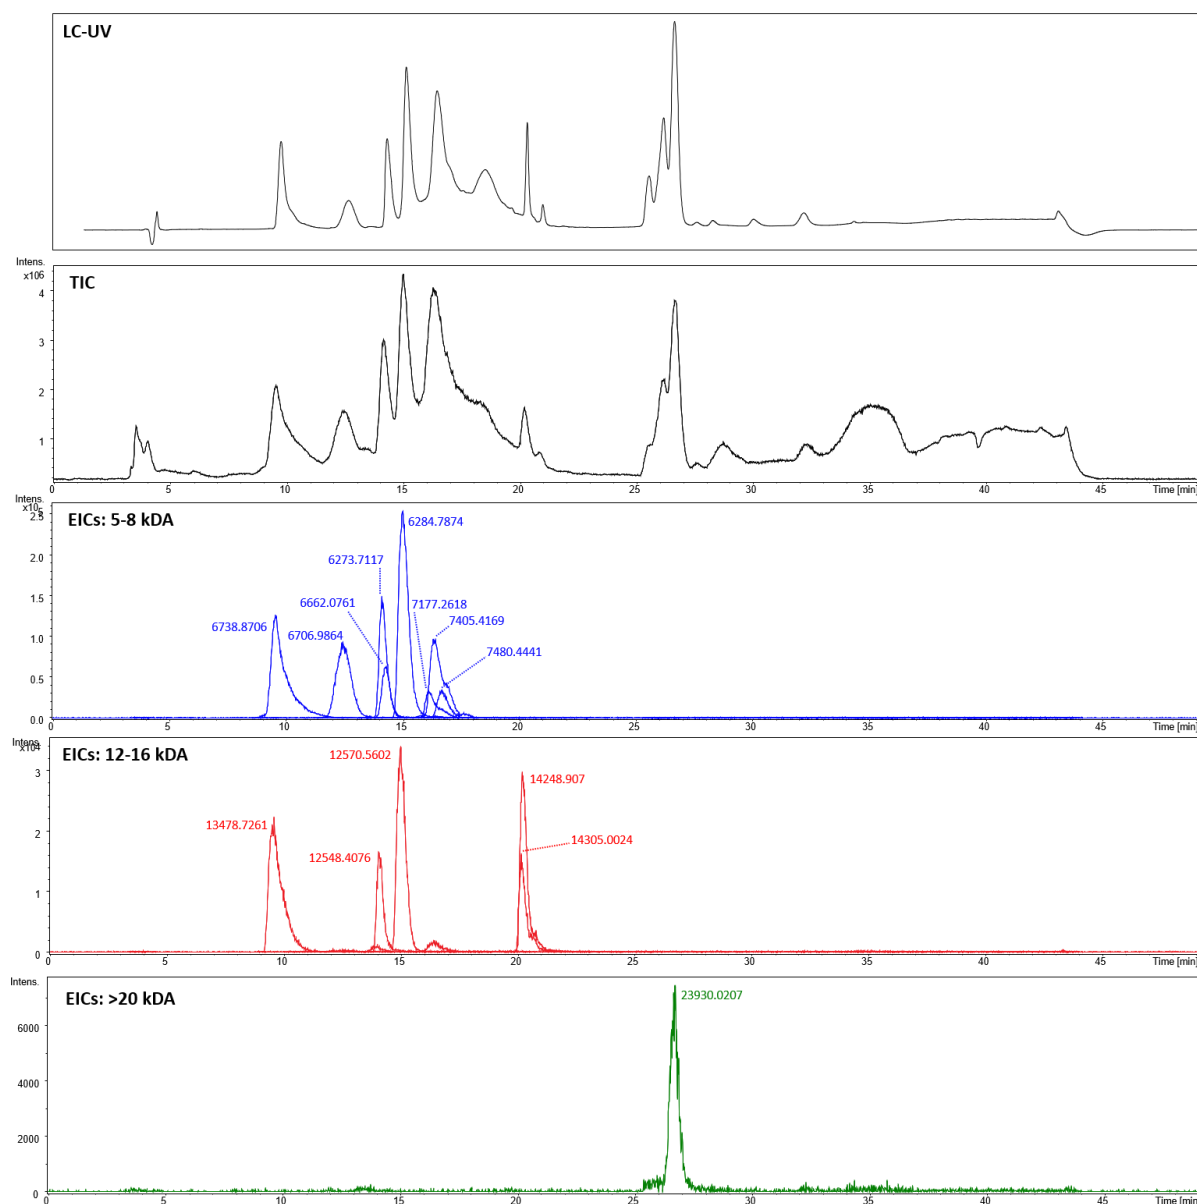

**Supplementary Figure S25.** LC-UV-MS chromatogram alignments highlight the abundant venom toxins in *Pseudonaja modesta* (PMOD13) venom. LC-UV peaks indicate the relative protein abundance following separation. TIC shows the summary of all measured intensities. EICs display the extracted, high-abundant masses in the venom. EICs are sorted based on their mass range to enhance visibility (i.e., mass ranges of 5-8 kDa, 12-16 kDa and >20 kDa). Key: LC-UV, liquid chromatography coupled to ultraviolet detection; TIC, Total Ion Chromatogram; EICs, Extracted Ion Chromatograms; MS, mass spectrometry.

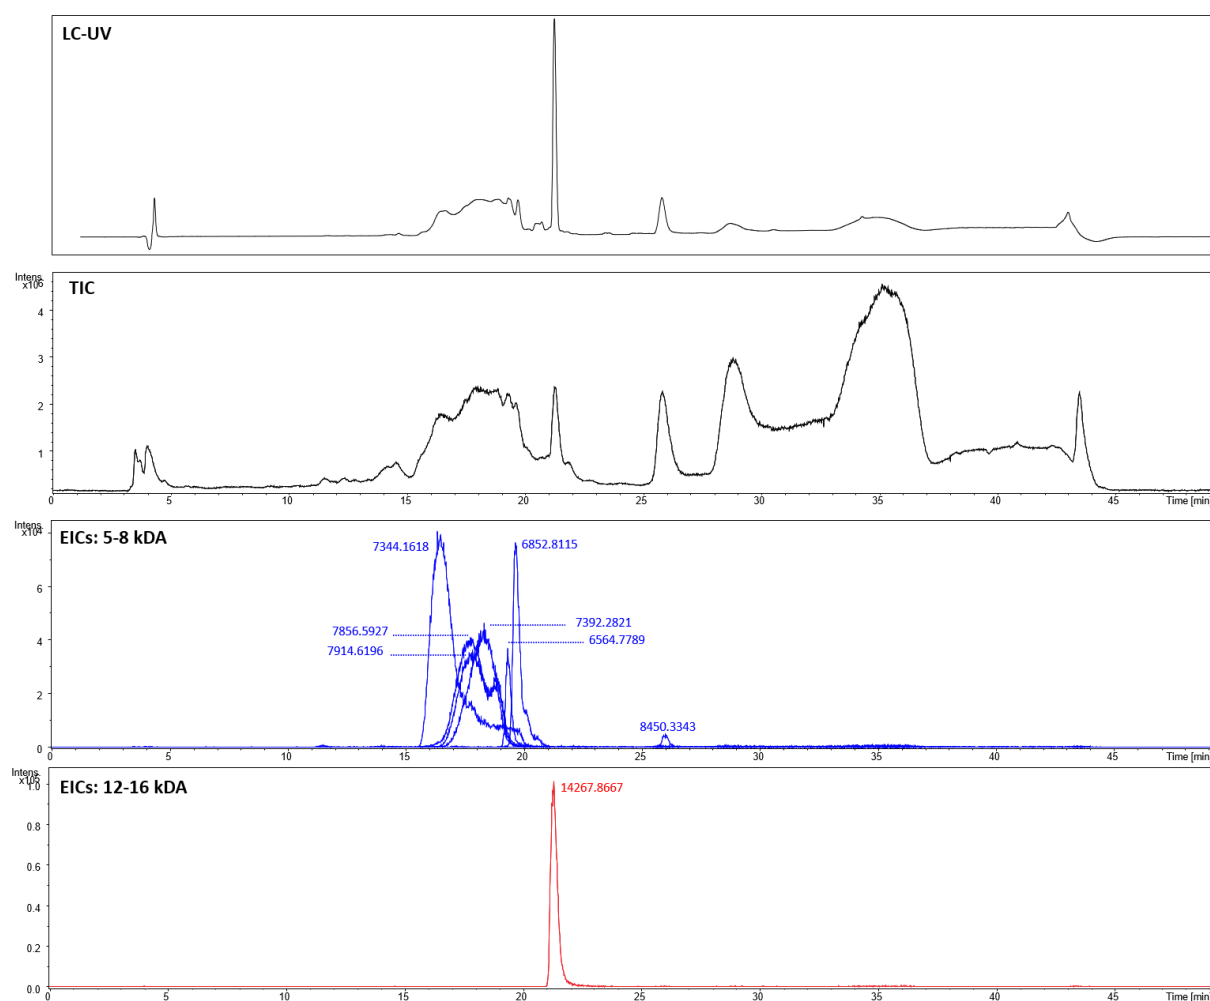

**Supplementary Figure S26.** LC-UV-MS chromatogram alignments highlight the abundant venom toxins in *Pseudonaja nuchalis* (PN37) venom. LC-UV peaks indicate the relative protein abundance following separation. TIC shows the summary of all measured intensities. EICs display the extracted, high-abundant masses in the venom. EICs are sorted based on their mass range to enhance visibility (i.e., mass ranges of 5-8 kDa and 12-16 kDa). Key: LC-UV, liquid chromatography coupled to ultraviolet detection; TIC, Total Ion Chromatogram; EICs, Extracted Ion Chromatograms; MS, mass spectrometry.

*Pseudonaja nuchalis* - Tennant Creek (PN38)

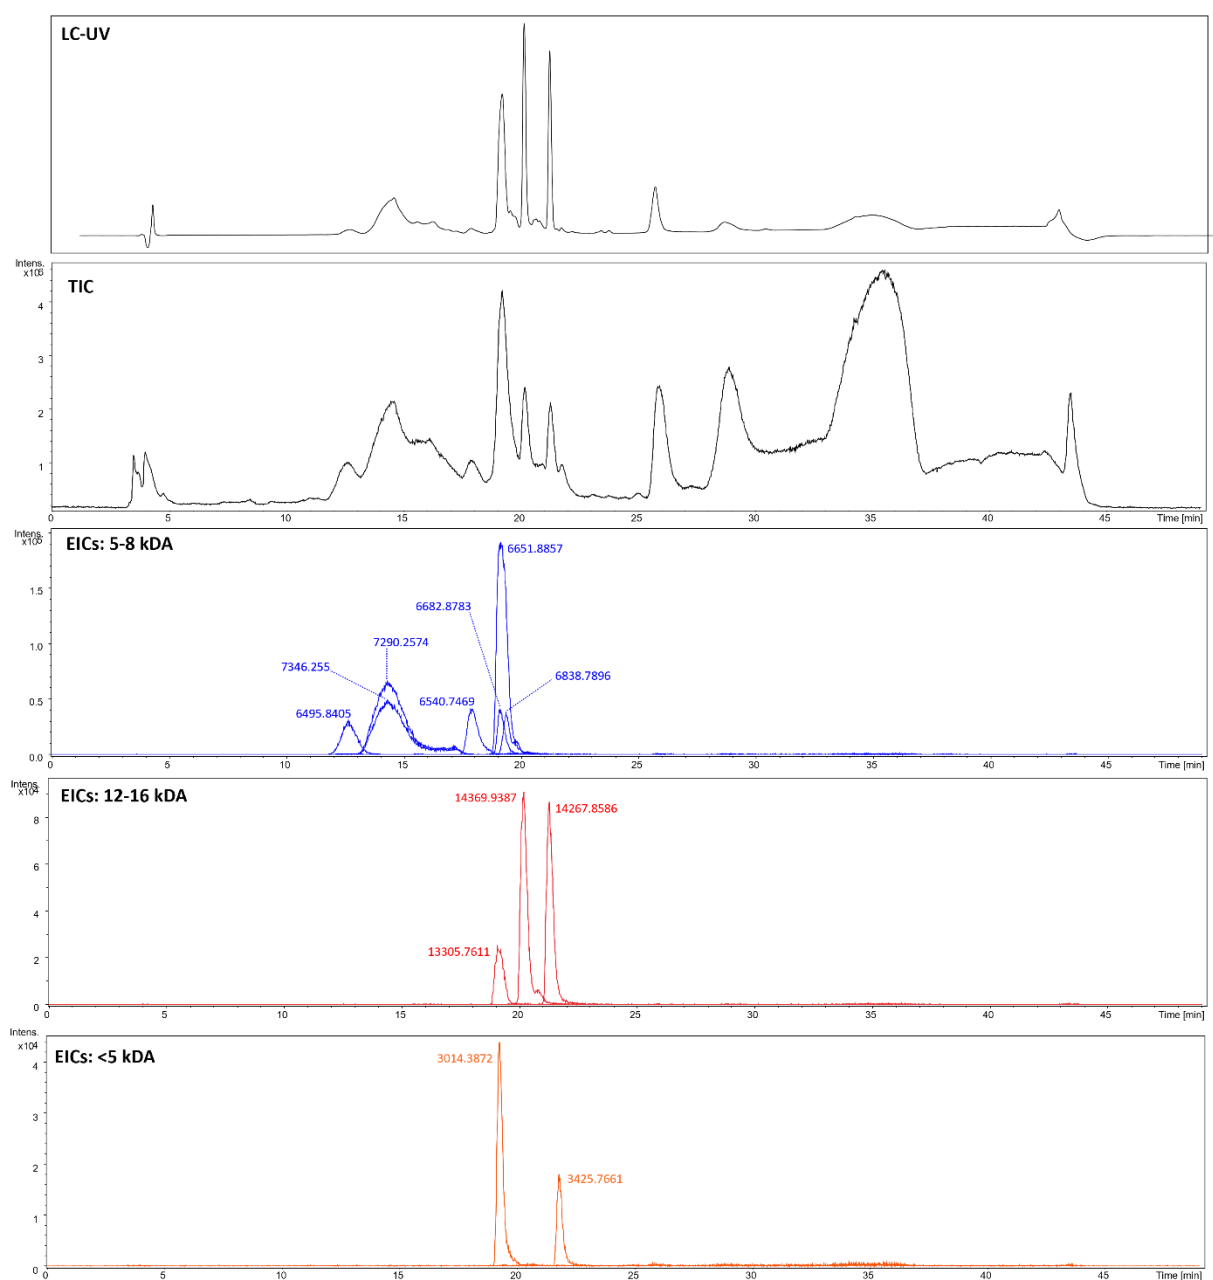

**Supplementary Figure S27.** LC-UV-MS chromatogram alignments highlight the abundant venom toxins in *Pseudonaja nuchalis* (PN38) venom. LC-UV peaks indicate the relative protein abundance following separation. TIC shows the summary of all measured intensities. EICs display the extracted, high-abundant masses in the venom. EICs are sorted based on their mass range to enhance visibility (i.e., mass ranges of 5-8 kDa, 12-16 kDa and <5 kDa). Key: LC-UV, liquid chromatography coupled to ultraviolet detection; TIC, Total Ion Chromatogram; EICs, Extracted Ion Chromatograms; MS, mass spectrometry.

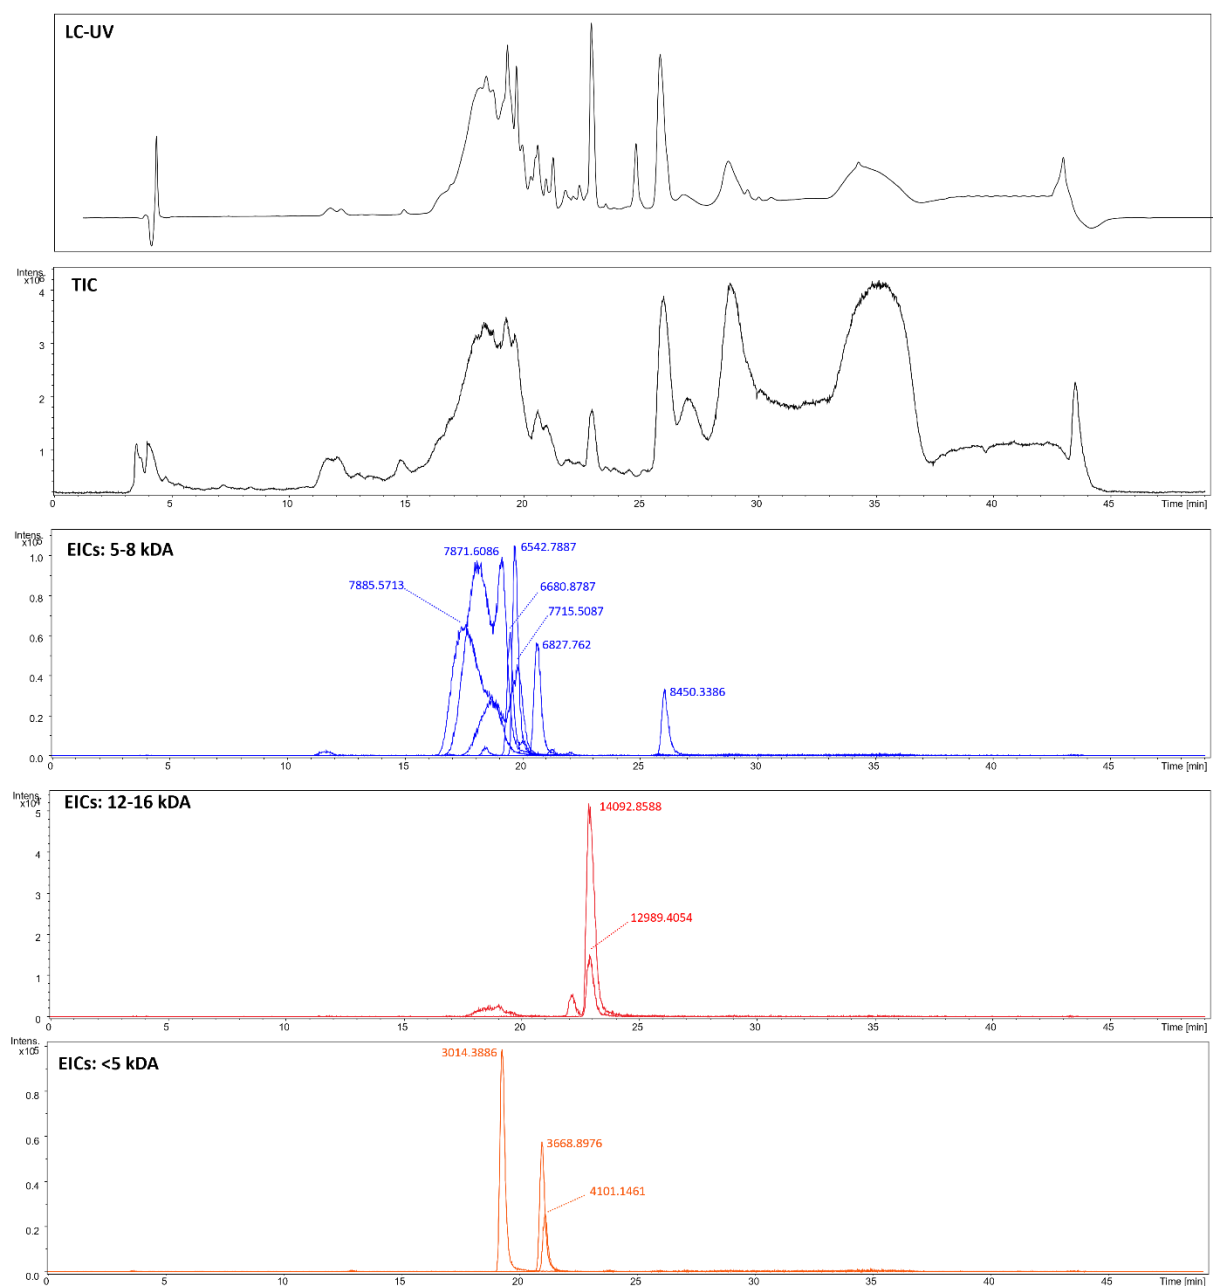

**Supplementary Figure S28.** LC-UV-MS chromatogram alignments highlight the abundant venom toxins in *Pseudonaja textilis* (CB493) venom. LC-UV peaks indicate the relative protein abundance following separation. TIC shows the summary of all measured intensities. EICs display the extracted, high-abundant masses in the venom. EICs are sorted based on their mass range to enhance visibility (i.e., mass ranges of 5-8 kDa, 12-16 kDa and <5 kDa). Key: LC-UV, liquid chromatography coupled to ultraviolet detection; TIC, Total Ion Chromatogram; EICs, Extracted Ion Chromatograms; MS, mass spectrometry.

*Pseudonaja textilis* - Gold Coast (CB479)

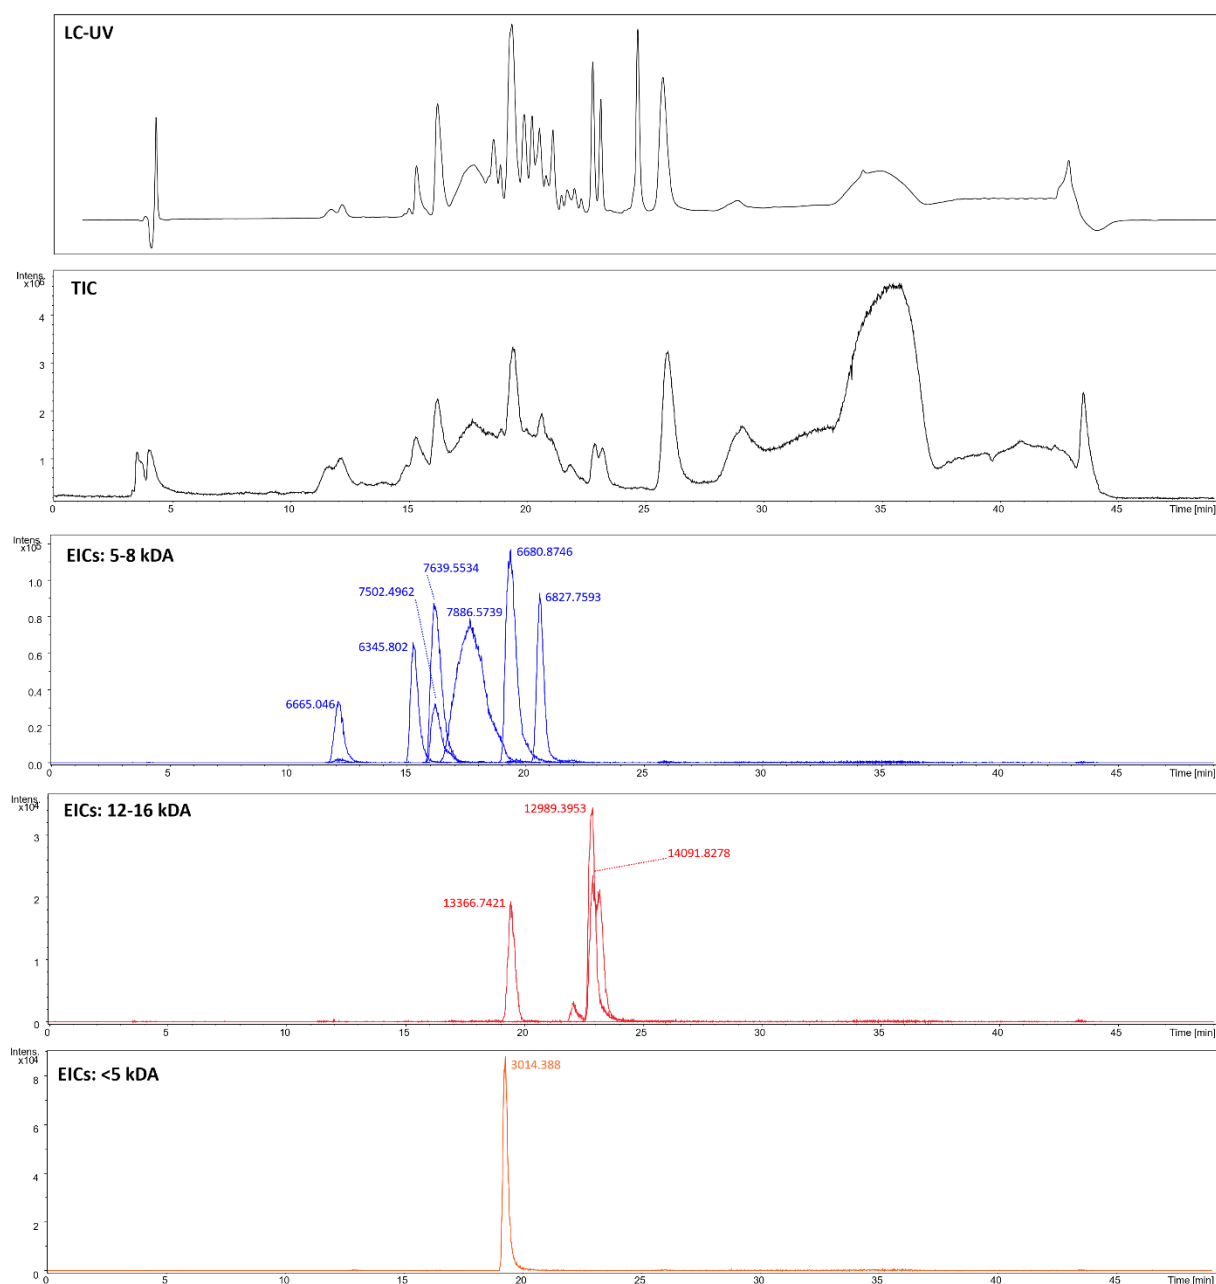

**Supplementary Figure S29.** LC-UV-MS chromatogram alignments highlight the abundant venom toxins in *Pseudonaja textilis* (CB479) venom. LC-UV peaks indicate the relative protein abundance following separation. TIC shows the summary of all measured intensities. EICs display the extracted, high-abundant masses in the venom. EICs are sorted based on their mass range to enhance visibility (i.e., mass ranges of 5-8 kDa, 12-16 kDa and <5 kDa). Key: LC-UV, liquid chromatography coupled to ultraviolet detection; TIC, Total Ion Chromatogram; EICs, Extracted Ion Chromatograms; MS, mass spectrometry.



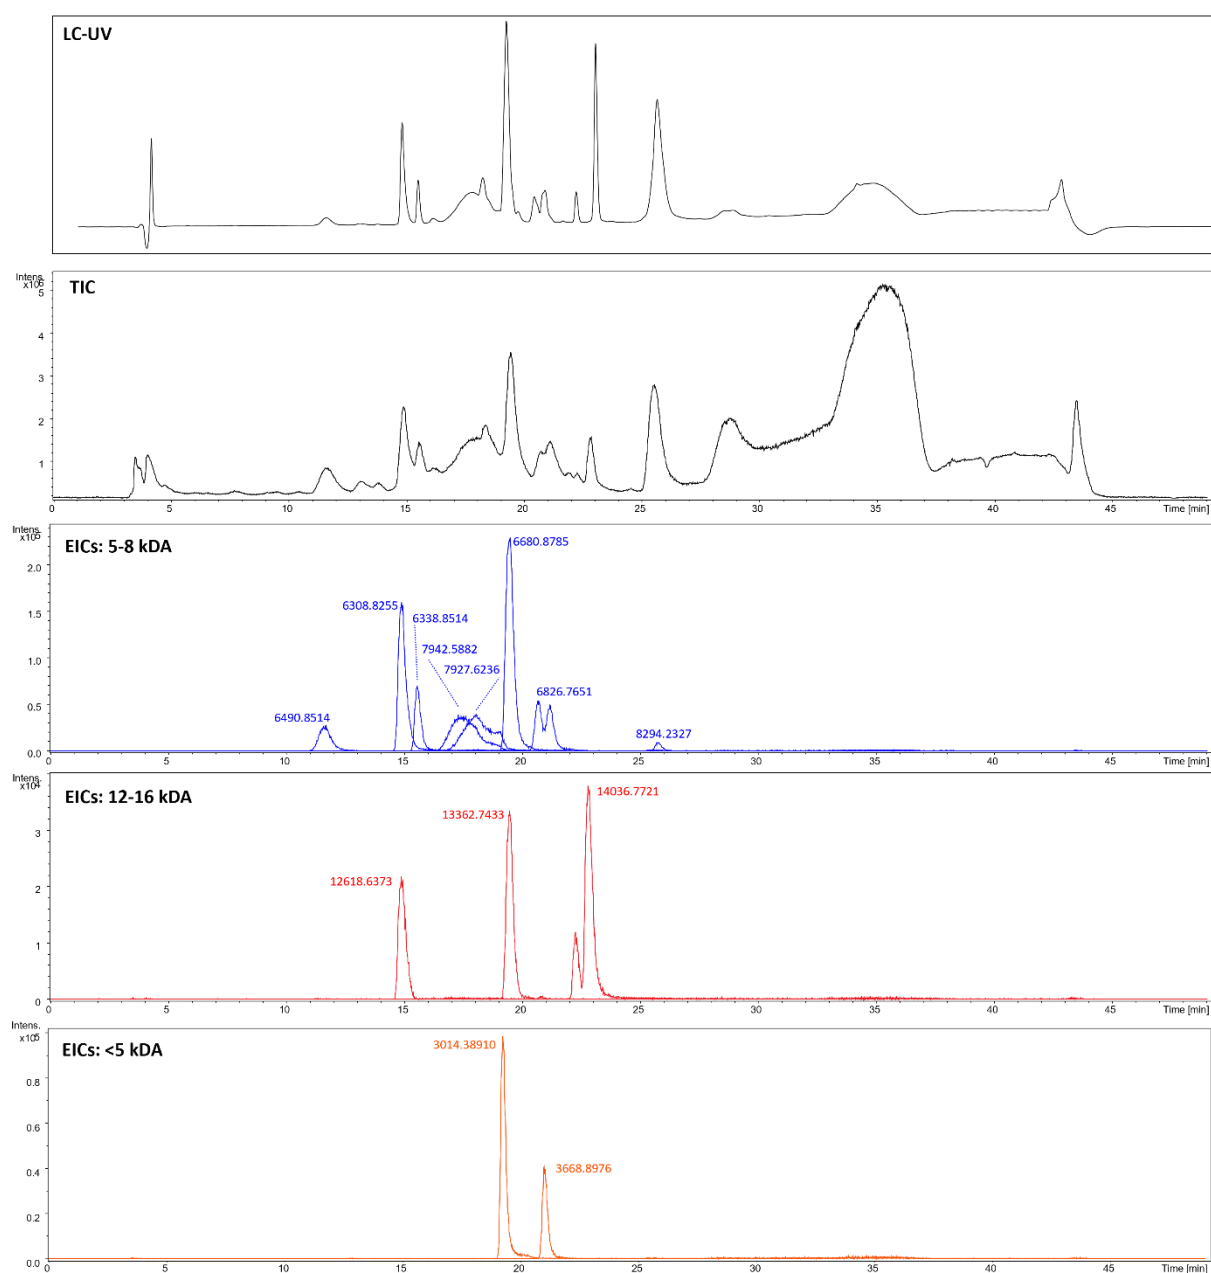

**Supplementary Figure S30.** LC-UV-MS chromatogram alignments highlight the abundant venom toxins in *Pseudonaja textilis* (CB485) venom. LC-UV peaks indicate the relative protein abundance following separation. TIC shows the summary of all measured intensities. EICs display the extracted, high-abundant masses in the venom. EICs are sorted based on their mass range to enhance visibility (i.e., mass ranges of 5-8 kDa, 12-16 kDa and <5 kDa). Key: LC-UV, liquid chromatography coupled to ultraviolet detection; TIC, Total Ion Chromatogram; EICs, Extracted Ion Chromatograms; MS, mass spectrometry.

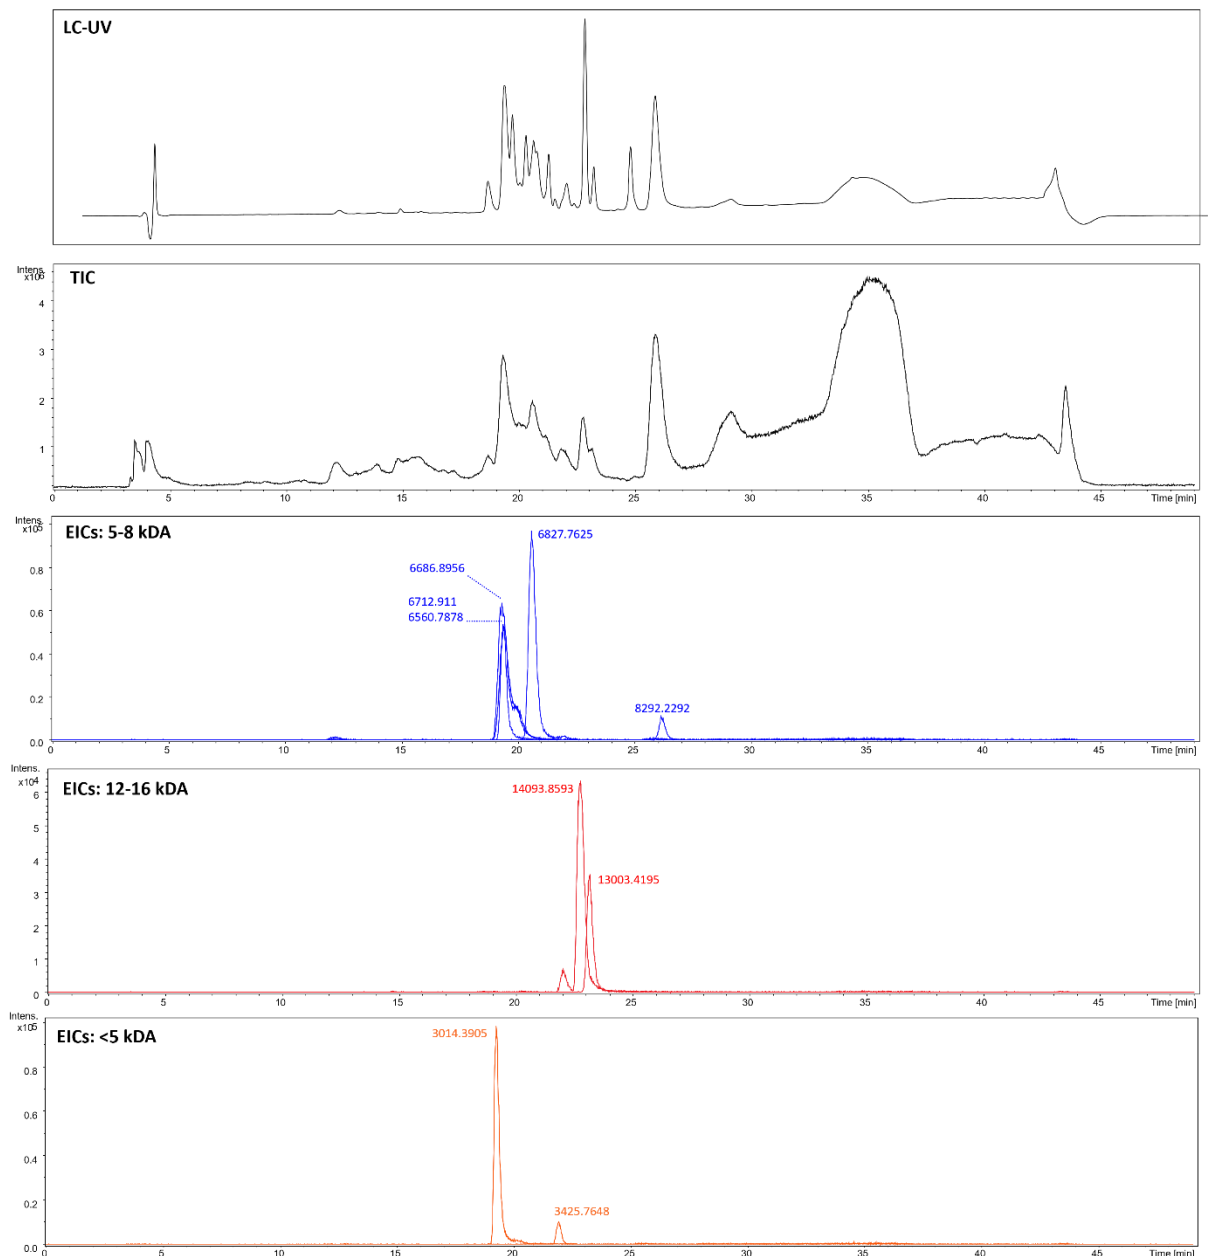

**Supplementary Figure S31.** LC-UV-MS chromatogram alignments highlight the abundant venom toxins in *Pseudonaja textilis* (CB467) venom. LC-UV peaks indicate the relative protein abundance following separation. TIC shows the summary of all measured intensities. EICs display the extracted, high-abundant masses in the venom. EICs are sorted based on their mass range to enhance visibility (i.e., mass ranges of 5-8 kDa, 12-16 kDa and <5 kDa). Key: LC-UV, liquid chromatography coupled to ultraviolet detection; TIC, Total Ion Chromatogram; EICs, Extracted Ion Chromatograms; MS, mass spectrometry.

## Coastal taipan (*Oxyuranus scutellatus*)

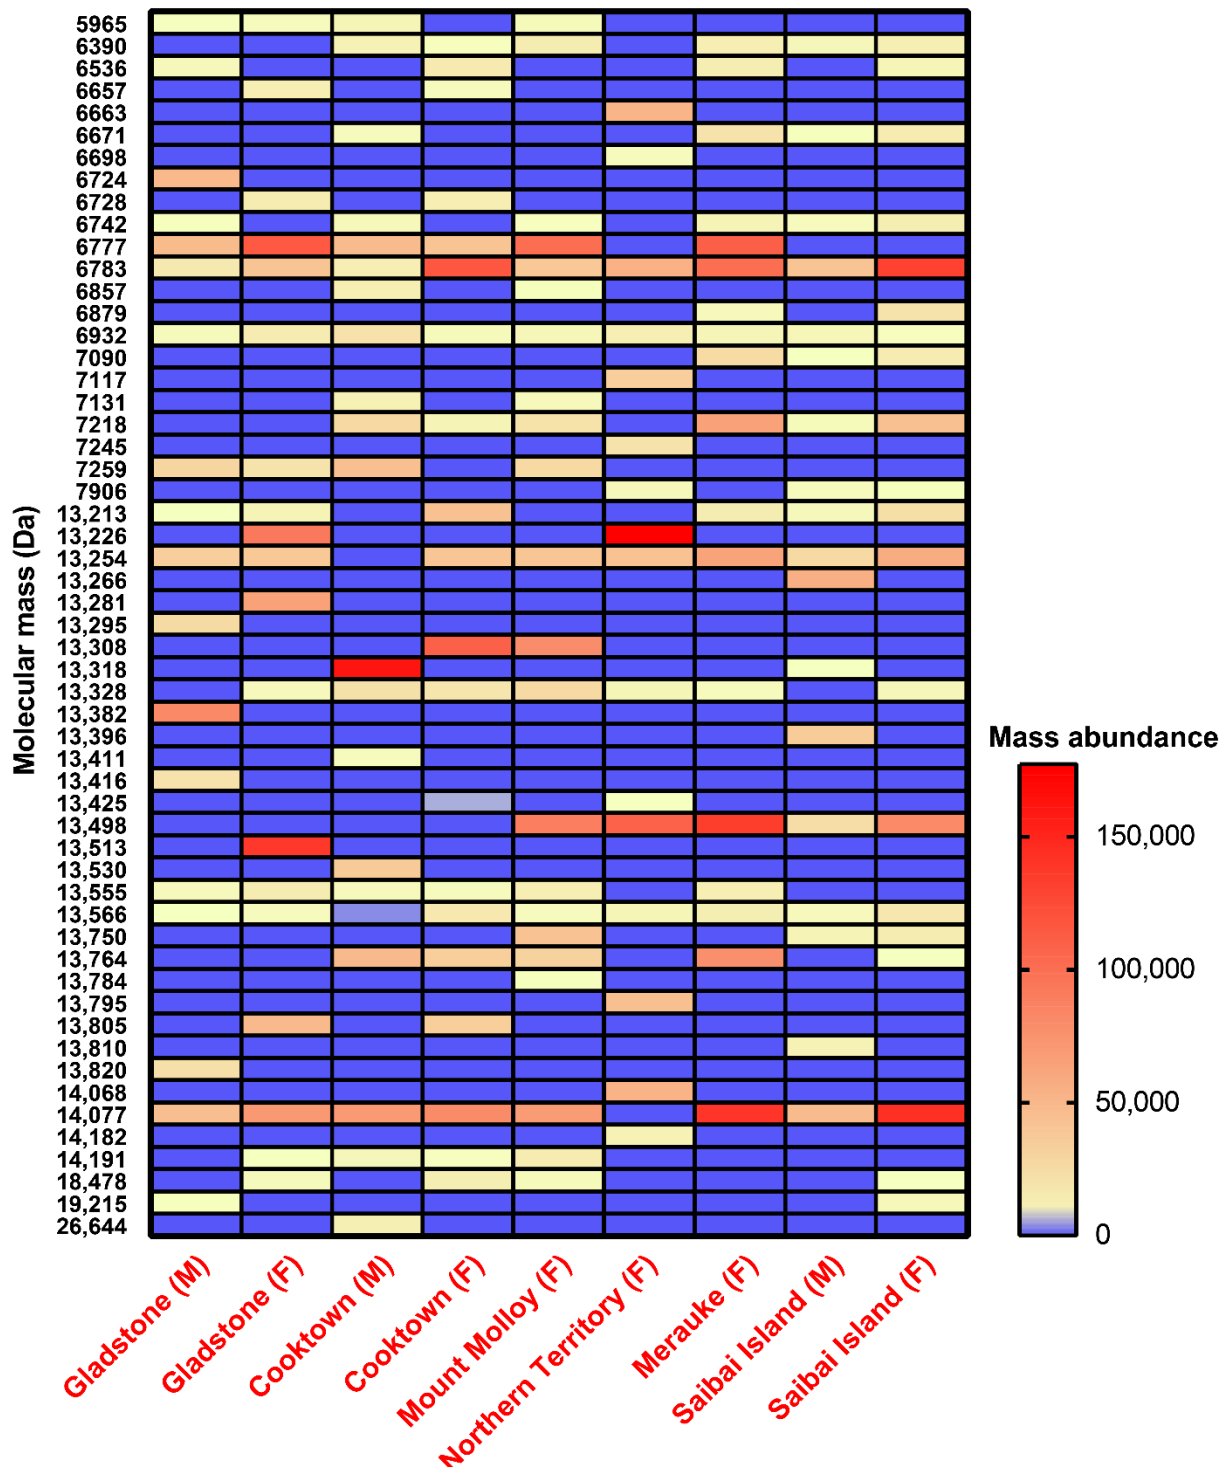

**Supplementary Figure S32.** Heatmap visualization of comparative protein abundances across coastal taipan (*Oxyuranus scutellatus*) venoms. Red or yellow indicate the presence of a mass and blue indicates the absence of a mass. The mass abundance is based on the measured intensity in each venom. Key: Da, Dalton; M, Male; F, Female.

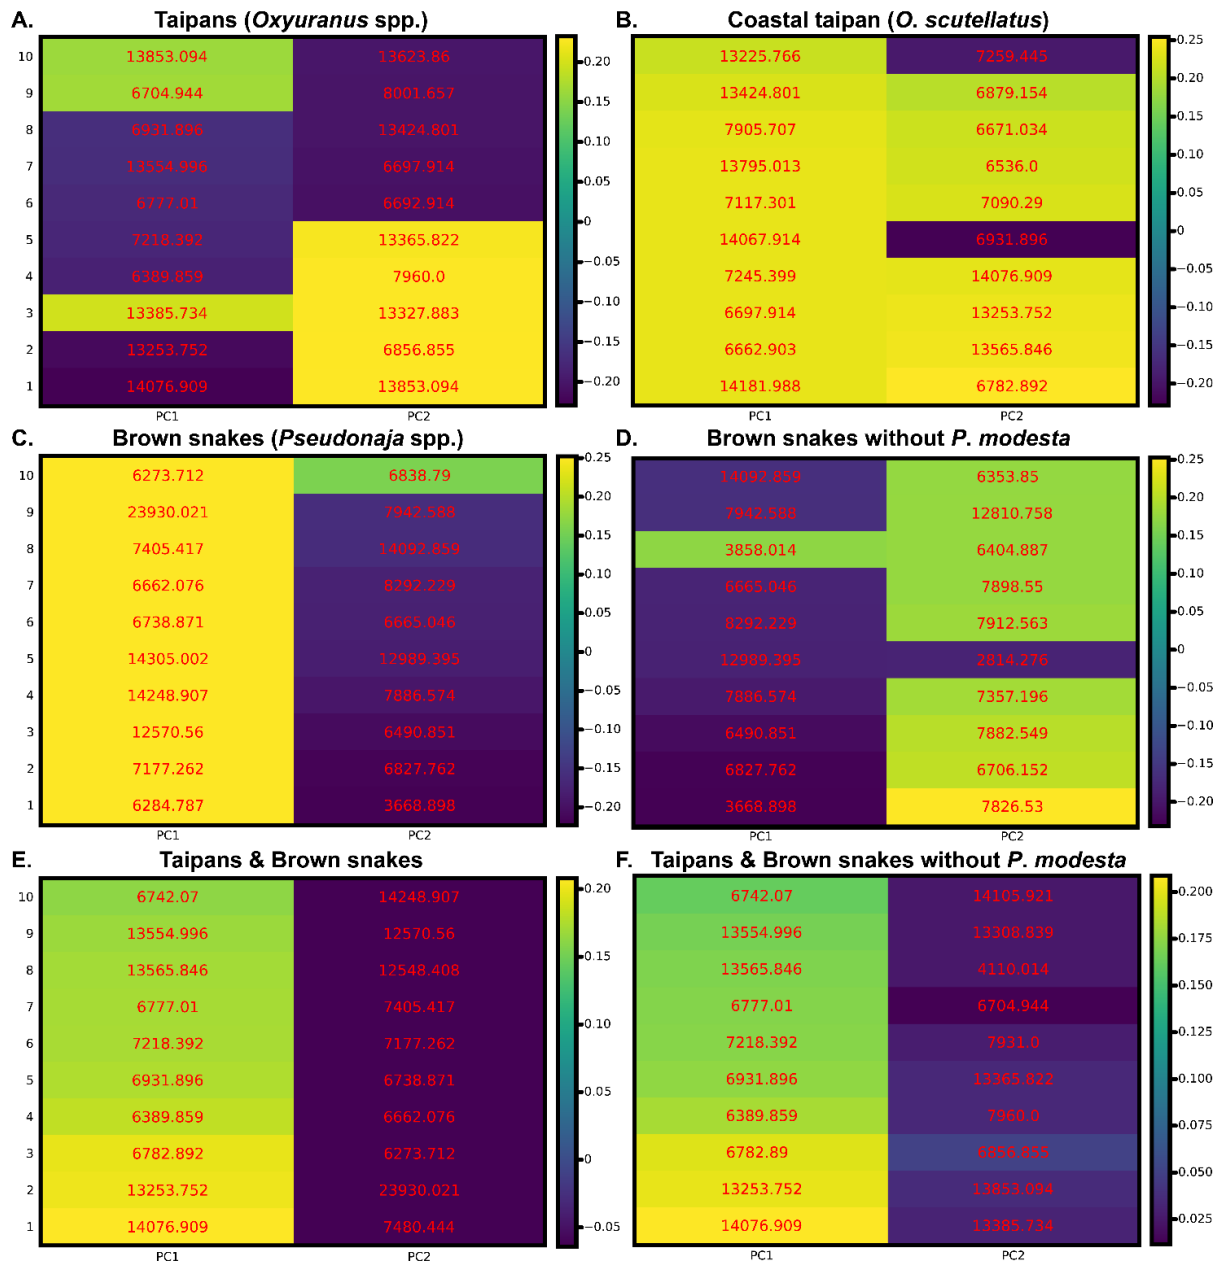

**Supplementary Figure S33.** Principal component analysis (PCA) loading scores of taipan (*Oxyuranus* spp.) and brown snake (*Pseudonaja* spp.) venoms. The 10 venom protein masses (Da) with the highest loading scores for PC1 and PC2 are shown. The color gradient ranges from yellow to dark blue, with yellow representing positive values and dark blue representing negative values. The higher the absolute value of the loading, the more relevant that variable becomes to define the PC. (A) Loading plots of PCA displayed in Figure 4A. (B) Loading plots of PCA displayed in Figure 4B. (C) Loading plots of PCA displayed in Figure 4C. (D) Loading plots of PCA displayed in Figure 4D. (E) Loading plots of PCA displayed in Figure 4E. (F) Loading plots of PCA displayed in Figure 4F.
